# Supplementary material for: Reaction mechanism and regioselectivity of uridine diphosphate glucosyltransferase RrUGT3: a combined experimental and computational study
Source: Royal Society of Chemistry journal article supplement (doi:10.1039/d4cy00721b), 2024-01-01
Supplement: d4cy00721b1.pdf [file d4cy00721b1.pdf]

## Supporting Information

### Reaction Mechanism and Regioselectivity of Uridine Diphosphate Glucosyltransferase RrUGT3: A Combined Experimental and Computational Study

Mengsha Li<sup>1,2#</sup>, Cai You<sup>3,4,5#</sup>, Fei Guo<sup>3#</sup>, Qingfang Han<sup>1,2</sup>, Xixian Xie<sup>1</sup>, Lijuan Ma<sup>1</sup>, Shengying Li<sup>3</sup>, Lei Du<sup>3\*</sup>, Xiang Sheng<sup>2,6\*</sup> and Hao Su<sup>2,6\*</sup>

1. College of Biotechnology, Tianjin University of Science & Technology, Tianjin 300457, P. R. China
2. Tianjin Institute of Industrial Biotechnology, Chinese Academy of Sciences, Tianjin 300308, P. R. China
3. State Key Laboratory of Microbial Technology, Shandong University, Qingdao 266237, Shandong, P. R. China
4. Shandong Provincial Key Laboratory of Synthetic Biology, CAS Key Laboratory of Biofuels, Qingdao Institute of Bioenergy and Bioprocess Technology, Chinese Academy of Sciences, Qingdao 266101, Shandong, P. R. China
5. Shandong Energy Institute, Qingdao 266101, P. R. China
6. National Center of Technology Innovation for Synthetic Biology, National Engineering Research Center of Industrial Enzymes and Key Laboratory of Engineering Biology for Low-Carbon Manufacturing, Tianjin 300308, P.R. China

### CONTENTS

|                                  |    |
|----------------------------------|----|
| 1. Supplementary Figures .....   | 1  |
| Figure S1. ....                  | 1  |
| Figure S2. ....                  | 1  |
| Figure S3. ....                  | 2  |
| Figure S4. ....                  | 2  |
| Figure S5. ....                  | 3  |
| Figure S6. ....                  | 3  |
| Figure S7. ....                  | 4  |
| Figure S8. ....                  | 4  |
| Figure S9. ....                  | 5  |
| Figure S10. ....                 | 5  |
| Figure S11. ....                 | 6  |
| Figure S12. ....                 | 6  |
| 2. Supplementary Tables.....     | 7  |
| Table S1.....                    | 7  |
| Table S2.....                    | 7  |
| Table S3.....                    | 8  |
| Table S4.....                    | 9  |
| Table S5.....                    | 9  |
| Table S6.....                    | 9  |
| Table S7.....                    | 10 |
| Table S8.....                    | 10 |
| 3. Cartesian Coordinates .....   | 11 |
| 4. Supplementary References..... | 27 |

## 1. Supplementary Figures

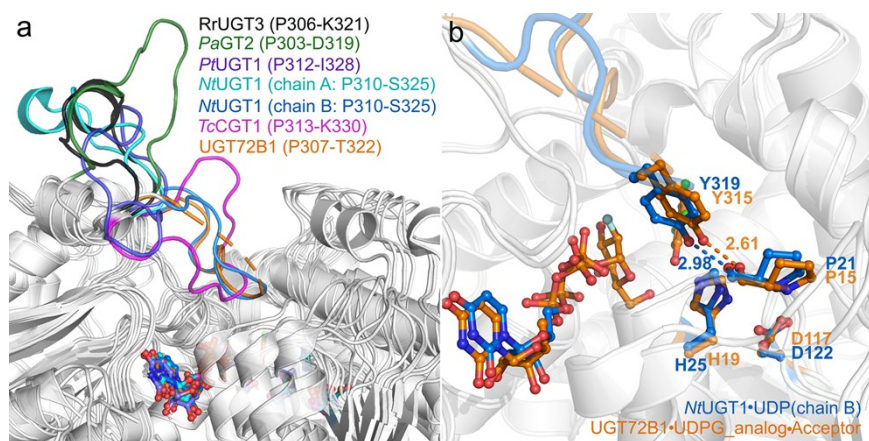

**Figure S1.** (a) Structural overlap of the homologous UGT enzymes. (b) The H-bond network analysis around the key tyrosine of the loop region of *UGT72B1* ternary complex and *NtUGT1* binary complex (chain B), with *UGT72B1* shown in orange and *NtUGT1* shown in blue. The distances are given in angstrom.

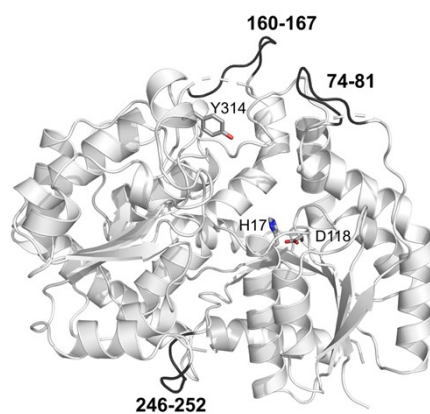

**Figure S2.** The added non-terminal residues that are missing in the crystal structure of *RrUGT3* using *MODELLER* (sequence: 74-81, 160-167 and 246-252).

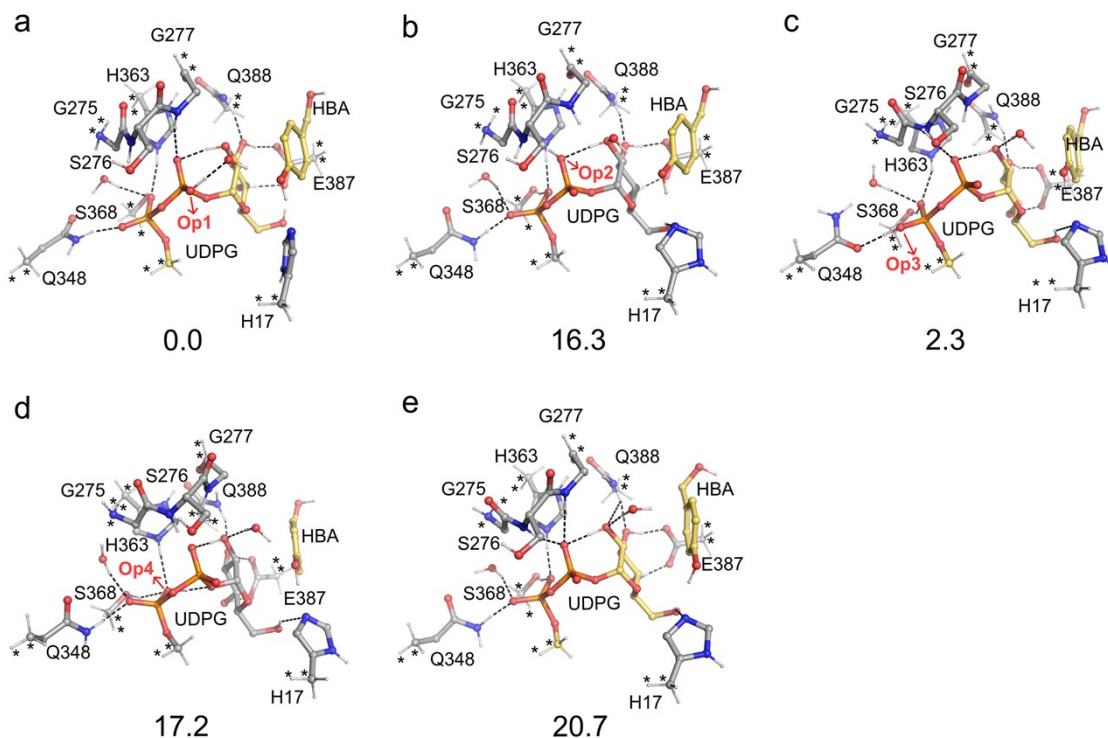

**Figure S3.** Optimized structures with the diphosphate group of UDPG is protonated at (a) Op1, (b) Op2, (c) Op3, (d) Op4, and (e) with the diphosphate group of UDPG was deprotonated. Fixed atoms during geometry optimizations are marked with stars. For clarity, most of the nonpolar hydrogens are hidden. The energy for the protonation of the diphosphate group of UDPG by a bulk proton was estimated using the following approximation:  $\Delta E = E(\text{protonated form}) - E(\text{deprotonated form}) + 279.8 \text{ kcal/mol}$ , in which 279.8 kcal/mol is the Gibbs free energy of a proton at pH = 7.<sup>1</sup> At the bottom of each figure, the energies relative to (a) are given in kcal/mol. The solvation effects were simulated using the SMD solvation model with  $\epsilon=4$ .

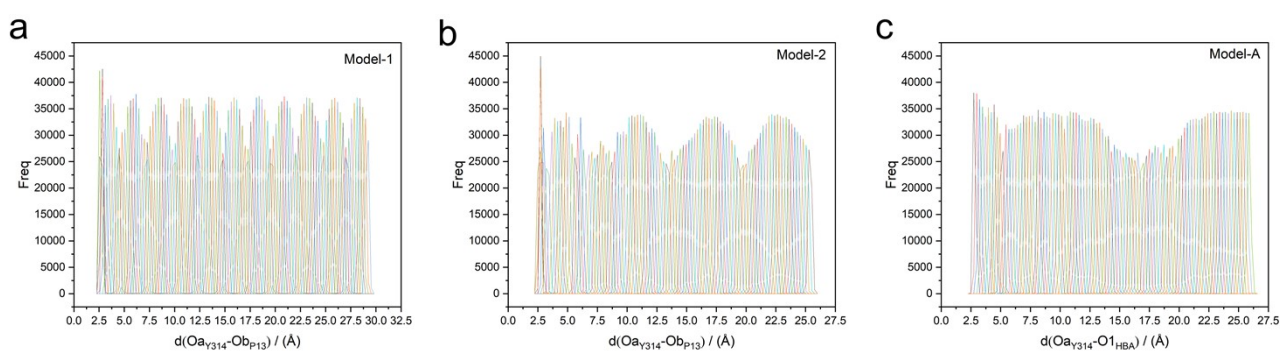

**Figure S4.** Histograms of constrained MD simulations from all windows of the US simulations for the “open-to-closed” transformation of (a) Model-1, (b) Model-2, and (c) Model-A.

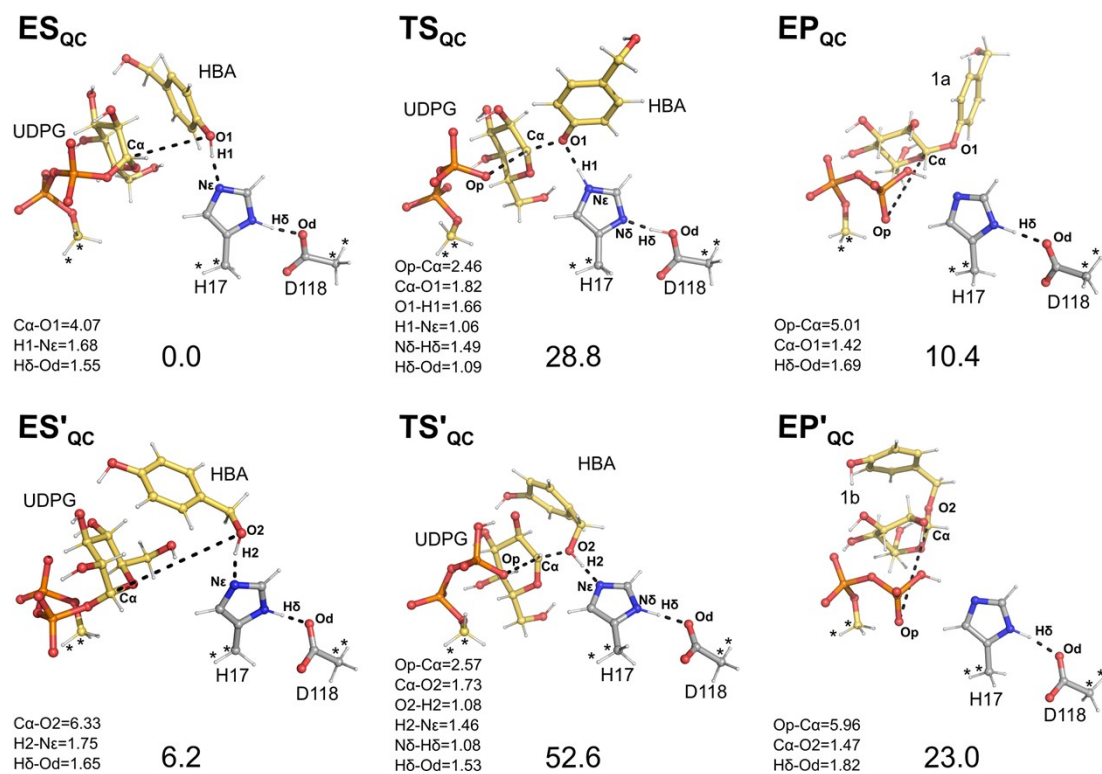

**Figure S5.** DFT optimized structures of Model-A<sub>C</sub> (ES<sub>QC</sub>, TS<sub>QC</sub>, EP<sub>QC</sub>) and Model-B<sub>C</sub> (ES'<sub>QC</sub>, TS'<sub>QC</sub>, EP'<sub>QC</sub>) with the diphosphate of UDPG in its deprotonated state. The energies relative to ES<sub>QC</sub> are given in kcal/mol, and distances are given in angstrom. Fixed atoms during geometry optimizations are marked with stars.

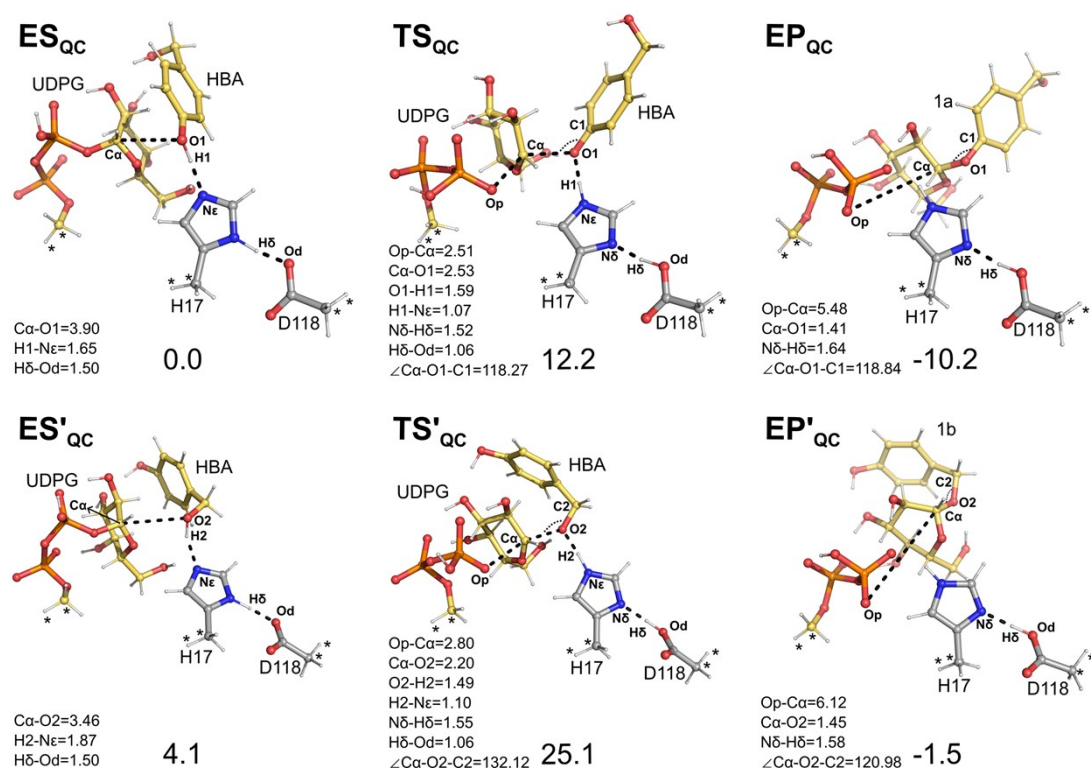

**Figure S6.** DFT optimized structures of Model-A<sub>C</sub> (ES<sub>QC</sub>, TS<sub>QC</sub>, EP<sub>QC</sub>) and Model-B<sub>C</sub> (ES'<sub>QC</sub>, TS'<sub>QC</sub>, EP'<sub>QC</sub>) with the diphosphate of UDPG in its singly protonated state. The calculated energies relative to ES<sub>QC</sub> are given in kcal/mol. Key distances and angles are given in angstrom and degree, respectively. Fixed atoms during geometry optimizations are marked with stars.

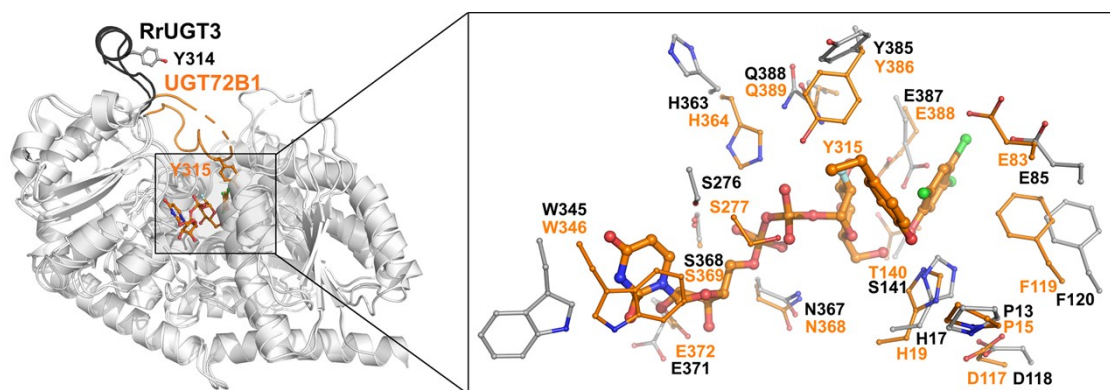

**Figure S7.** Comparison of the flexible loop region and binding pocket of apo-RrUGT3 with the homologous ternary complex of UGT72B1•UDP-2-deoxy-2-fluoro glucose•2,4,5-trichlorophenol. The RrUGT3 is shown in gray and the UGT72B1 is shown in orange.

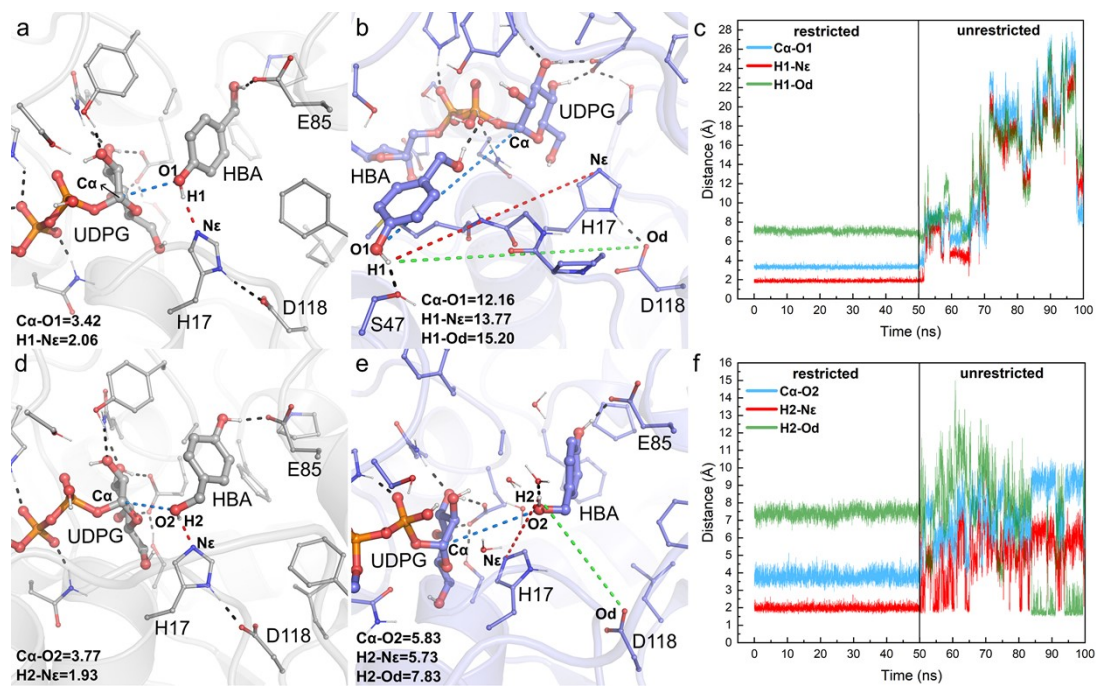

**Figure S8.** Geometry information of the starting and the final snapshots from the MD simulations of (a,b) Model-A<sub>0</sub> and (d,e) Model-B<sub>0</sub>, and the fluctuation of key distances during the 50 ns of restricted and unrestricted MD simulations for (c) Model-A<sub>0</sub> and (f) Model-B<sub>0</sub>. Key distances are given in angstrom.

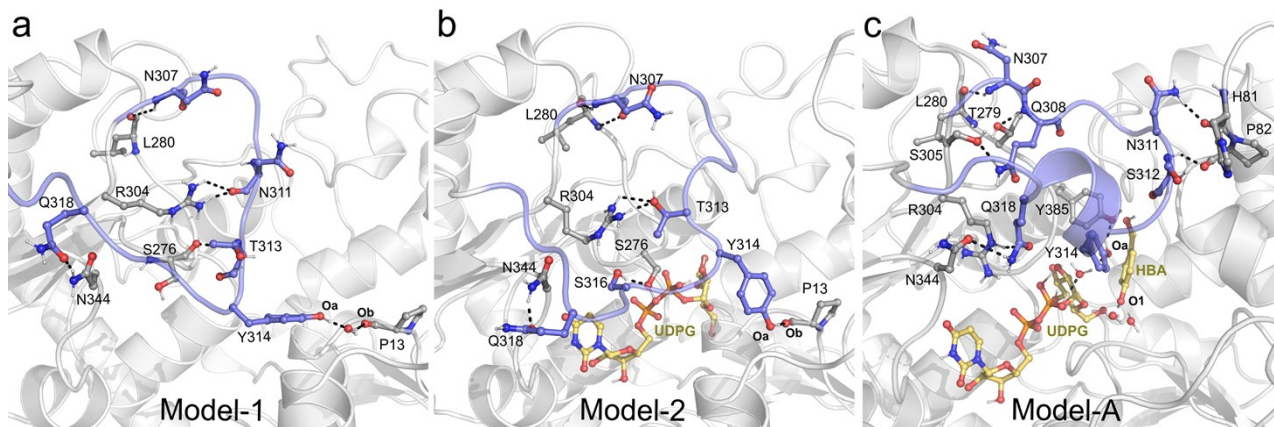

**Figure S9.** The hydrogen bond network analysis of the loop region of the most representative trajectory from (a) Model-1, (b) Model-2, and (c) Model-A in the “closed” state.

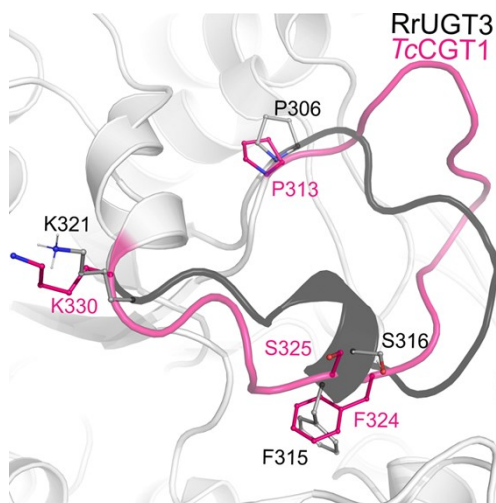

**Figure S10.** The overlap of  $\Omega$ -1 loop region between the representative snapshot of the “closed” state of Model-A and the crystal structure of highly homologous enzyme *TcCGT1* (PDB ID: 6JTD). The  $\Omega$ -1 loop region of Model-A is shown in black while the  $\Omega$ -1 loop region of *TcCGT1* is shown in pink. The conserved residues in the  $\Omega$ -1 loop region are shown as ball and sticks.

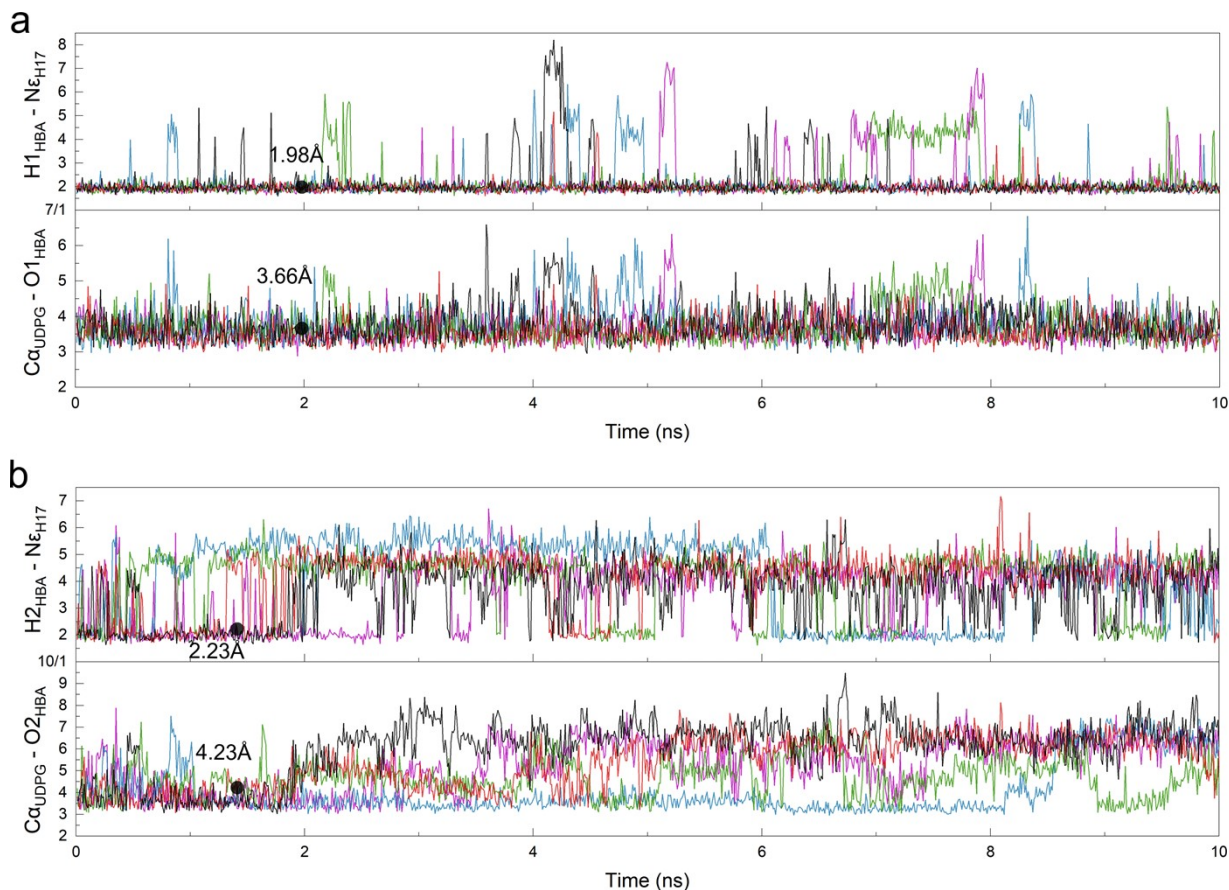

**Figure S11.** Fluctuation of key distances from five replicates unrestricted MD simulations of Model-A<sub>C</sub> and Model-B<sub>C</sub>. (a) The distances of Cα-O1 and H1-Nε for Model-A<sub>C</sub>. (b) The distances of Cα-O2 and H2-Nε for Model-B<sub>C</sub>. Distances are given in angstrom. The position of the obtained representative conformations in the MD trajectories were marked using black dots.

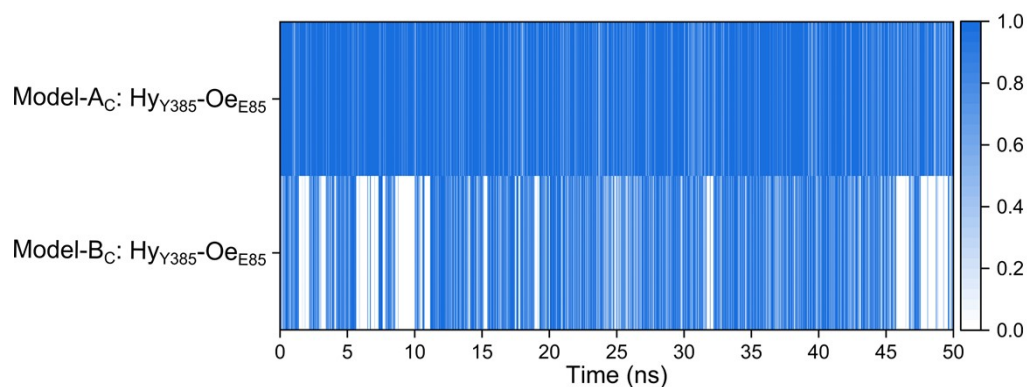

**Figure S12.** The heatmap of hydrogen bond interactions between Hy<sub>Y385</sub> and Oe<sub>E85</sub> from unrestricted MD simulations of Model-A<sub>C</sub> and Model-B<sub>C</sub>.

## 2. Supplementary Tables

**Table S1.** Strains and plasmids used in this study.

| Strain        | Host                     | Genotype/Description         | Source                            |
|---------------|--------------------------|------------------------------|-----------------------------------|
| Rr3           | <i>E. coli</i> BL21(DE3) | pETM11- <i>RrUGT3</i>        | This study                        |
| Rr3-WT / GF-9 | <i>E. coli</i> BL21(DE3) | pET28b- <i>RrUGT3</i>        | Guo F., et al., 2022 <sup>2</sup> |
| Rr3-H17A      | <i>E. coli</i> BL21(DE3) | pET28b- <i>RrUGT3(H17A)</i>  | This study                        |
| Rr3-D118A     | <i>E. coli</i> BL21(DE3) | pET28b- <i>RrUGT3(D118A)</i> | This study                        |
| Rr3-F120A     | <i>E. coli</i> BL21(DE3) | pET28b- <i>RrUGT3(F120A)</i> | This study                        |
| Rr3-Y314A     | <i>E. coli</i> BL21(DE3) | pET28b- <i>RrUGT3(Y314A)</i> | This study                        |
| Rr3-E85A      | <i>E. coli</i> BL21(DE3) | pET28b- <i>RrUGT3(E85A)</i>  | This study                        |

**Table S2.** Primers used in this study.

| Plasmid                          | Primer   | Sequence (5'-3')                  |
|----------------------------------|----------|-----------------------------------|
| pETM11- <i>RrUGT3</i>            | RrUGT3-F | AAAACCATGGCTGGCACCCACACATC        |
|                                  | RrUGT3-R | AAAACCTCGAGTTAATGCTTCATAGAAGAACGC |
| pET28b (+)- <i>RrUGT3(H17A)</i>  | H17A-F   | TGGGCGCACTGATCCCGATGGCCGA         |
|                                  | H17A-R   | GGATCAGTGCGCCCATGCCCGGGCT         |
| pET28b (+)- <i>RrUGT3(D118A)</i> | D118A-F  | GTTGTTGCACTGTTCCGGCACTGATGCATTC   |
|                                  | D118A-R  | GAACAGTGCAACAACCAGAGAAACCAGGTT    |
| pET28b (+)- <i>RrUGT3(F120A)</i> | F120A-F  | GATCTGGCAGGCACTGATGCATTCGACCCG    |
|                                  | F120A-R  | AGTGCCCTGCCAGATCAACAACCAGAGAAAC   |
| pET28b (+)- <i>RrUGT3(Y314A)</i> | Y314A-F  | AGCACCGCATTCTCTGTACAAAGCCA        |
|                                  | Y314A-R  | AGAGAATGCGGTGCTGTTCGGGATTTGGT     |
| pET28b (+)- <i>RrUGT3(E85A)</i>  | E85A-F   | CGTATCGCAACCCCTGATCTCCCTGACCGTT   |
|                                  | E85A-R   | CAGGGTTGCGATACGCGGATGAGCTGGAGA    |



**Table S3.** Diffraction-data collection and refinement statistics.

|                                         |                                                                       |
|-----------------------------------------|-----------------------------------------------------------------------|
|                                         | RrUGT3                                                                |
| <b>PDB code</b>                         | 8YP7                                                                  |
| <b>Data collection statistics</b>       |                                                                       |
| X-ray source                            | BL19U1, SSRF                                                          |
| Wavelength (Å)                          | 0.97915                                                               |
| Space group                             | $P2_12_12_1$                                                          |
| Unit-cell dimensions (Å or °)           | a = 69.19, b = 70.83, c = 92.66,<br>$\alpha = \beta = \gamma = 90.00$ |
| Resolution range (Å)                    | 46.33–1.87 (1.91–1.87)                                                |
| Number of unique reflections            | 38051 (2124)                                                          |
| Completeness (%)                        | 99.2 (87.6)                                                           |
| Mean I/sigma(I)                         | 20.6 (1.4)                                                            |
| Multiplicity                            | 13.1 (13.2)                                                           |
| $R_{\text{merge}}$                      | 0.090 (2.018)                                                         |
| $R_{\text{measure}}$                    | 0.093 (2.099)                                                         |
| $CC_{1/2}$ (%)                          | 100 (58.5)                                                            |
| <b>Refinement statistics</b>            |                                                                       |
| Resolution (Å)                          | 1.87                                                                  |
| $R_{\text{work}} / R_{\text{free}}$ (%) | 17.95/21.21                                                           |
| Protein atoms                           | 3419                                                                  |
| Water                                   | 160                                                                   |
| B factor (Å <sup>2</sup> )              |                                                                       |
| Protein                                 | 32.32                                                                 |
| Water                                   | 37.13                                                                 |
| RMSD in bond lengths (Å)                | 0.010                                                                 |
| RMSD in bond angles (°)                 | 1.62                                                                  |
| Ramachandran plot (%)                   |                                                                       |
| favored                                 | 97.25%                                                                |
| allowed                                 | 2.52%                                                                 |

**Table S4.** Estimation of the  $pK_a$  of the enzyme-bound substrate (UDPG). “H” represents that one phosphate group of diphosphate of UDPG is protonated, “D” represents the diphosphate of UDPG is deprotonated. The  $pK_a$  value of acetic acid in aqueous solution was taken from previous study (measured to be 4.76)<sup>3</sup> and been used as a reference. All the calculations were carried out at the B3LYP/def2-SVP level of theory.

|                                                                                                                                                   |                                                                                                                    |
|---------------------------------------------------------------------------------------------------------------------------------------------------|--------------------------------------------------------------------------------------------------------------------|
| The $pK_a$ of the UDPG when Op1 atom was protonated.                                                                                              |                                                                                                                    |
| Deprotonation energy of the enzyme-bound substrate.                                                                                               | $\Delta E_1 = E(\mathbf{E:H})_{\epsilon=4} - E(\mathbf{E:D})_{\epsilon=4} = 300.5$ kcal/mol                        |
| Deprotonation energy of the acetic acid in aqueous solution.                                                                                      | $\Delta E_2 = E(\text{CH}_3\text{COOH})_{\epsilon=78} - E(\text{CH}_3\text{COO}^-)_{\epsilon=78} = 281.7$ kcal/mol |
| $\Delta pK_a = (\Delta E_1 - \Delta E_2) / 2.303RT = 18.8 / 1.37 = 13.72$ , The $pK_a$ of enzyme-bound substrate: $13.72 + 4.76 = \mathbf{18.48}$ |                                                                                                                    |
| The $pK_a$ of the UDPG when Op2 atom was protonated.                                                                                              |                                                                                                                    |
| Deprotonation energy of the enzyme-bound substrate.                                                                                               | $\Delta E_1 = E(\mathbf{E:H})_{\epsilon=4} - E(\mathbf{E:D})_{\epsilon=4} = 284.3$ kcal/mol                        |
| $\Delta pK_a = (\Delta E_1 - \Delta E_2) / 2.303RT = 2.6 / 1.37 = 1.90$ , The $pK_a$ of enzyme-bound substrate: $1.91 + 4.76 = \mathbf{6.66}$     |                                                                                                                    |
| The $pK_a$ of the UDPG when Op3 atom was protonated.                                                                                              |                                                                                                                    |
| Deprotonation energy of the enzyme-bound substrate.                                                                                               | $\Delta E_1 = E(\mathbf{E:H})_{\epsilon=4} - E(\mathbf{E:D})_{\epsilon=4} = 298.3$ kcal/mol                        |
| $\Delta pK_a = (\Delta E_1 - \Delta E_2) / 2.303RT = 16.6 / 1.37 = 12.12$ , The $pK_a$ of enzyme-bound substrate: $12.13 + 4.76 = \mathbf{16.88}$ |                                                                                                                    |
| The $pK_a$ of the UDPG when Op4 atom was protonated.                                                                                              |                                                                                                                    |
| Deprotonation energy of the enzyme-bound substrate.                                                                                               | $\Delta E_1 = E(\mathbf{E:H})_{\epsilon=4} - E(\mathbf{E:D})_{\epsilon=4} = 283.4$ kcal/mol                        |
| $\Delta pK_a = (\Delta E_1 - \Delta E_2) / 2.303RT = 1.7 / 1.37 = 1.24$ , The $pK_a$ of enzyme-bound substrate: $1.26 + 4.76 = \mathbf{6.00}$     |                                                                                                                    |

**Table S5.** The MM-PBSA calculated binding free energies of the substrates (UDPG and HBA) to the enzyme at the “open” and “closed” state of Model-A and Model-B.

|        | Type                 | Binding free energy (kcal/mol) |
|--------|----------------------|--------------------------------|
| Open   | Model-A <sub>O</sub> | -24.5                          |
|        | Model-B <sub>O</sub> | -13.7                          |
| Closed | Model-A <sub>C</sub> | -36.2                          |
|        | Model-B <sub>C</sub> | -39.1                          |

**Table S6.** Calculated energies of Model-A<sub>C</sub> (ES, TS, EP) and Model-B<sub>C</sub> (ES', TS', EP') by using QM/MM methods.

|                      |     | $E_{BS1}$<br>(a.u.) | $E_{BS2}$<br>(a.u.) | $E_{ZPE}$<br>(a.u.) | $E$<br>(a.u.) | $\Delta H$<br>(kcal/mol) |
|----------------------|-----|---------------------|---------------------|---------------------|---------------|--------------------------|
| Model-A <sub>C</sub> | ES  | -4961.330013        | -4966.502371        | 1.260096            | -4965.242275  | 0                        |
|                      | TS  | -4961.293482        | -4966.474077        | 1.256475            | -4965.217602  | 15.5                     |
|                      | EP  | -4961.314626        | -4966.495776        | 1.258661            | -4965.237115  | 3.2                      |
| Model-B <sub>C</sub> | ES' | -4654.614496        | -4659.399765        | 1.152152            | -4658.247612  | 0                        |
|                      | TS' | -4654.575962        | -4659.366772        | 1.150675            | -4658.216097  | 19.8                     |
|                      | EP' | -4654.608626        | -4659.396798        | 1.153087            | -4658.243711  | 2.4                      |

**Table S7.** DFT calculated energies of stationaries for the phenolic and alcoholic glycosylation from Model-A<sub>C</sub> and Model-B<sub>C</sub>, with the diphosphate of UDPG in its deprotonated state. The solvation effects were calculated using the SMD solvation model with  $\epsilon=78$ .

| Deprotonated at diphosphate of UDPG |                   | E <sub>BS1</sub><br>(a.u.) | E <sub>solvation</sub><br>(a.u.) | E <sub>BS2</sub><br>(a.u.) | E <sub>ZPE</sub><br>(a.u.) | E<br>(a.u.)  | ΔE<br>(kcal/mol) |
|-------------------------------------|-------------------|----------------------------|----------------------------------|----------------------------|----------------------------|--------------|------------------|
| Phenolic glycosylation              | ES <sub>QC</sub>  | -2775.252844               | -2775.701499                     | -2778.009746               | 0.503928                   | -2777.954473 | 0                |
|                                     | TS <sub>QC</sub>  | -2775.130937               | -2775.639980                     | -2777.894465               | 0.494886                   | -2777.908622 | 28.8             |
|                                     | EP <sub>QC</sub>  | -2775.206209               | -2775.678714                     | -2777.967823               | 0.502466                   | -2777.937862 | 10.4             |
| Alcoholic glycosylation             | ES' <sub>QC</sub> | -2775.245427               | -2775.691444                     | -2778.001698               | 0.503102                   | -2777.944613 | 6.2              |
|                                     | TS' <sub>QC</sub> | -2775.117734               | -2775.603938                     | -2777.880888               | 0.496520                   | -2777.870572 | 52.6             |
|                                     | EP' <sub>QC</sub> | -2775.194245               | -2775.661120                     | -2777.953429               | 0.502398                   | -2777.917906 | 23.0             |

**Table S8.** DFT calculated energies of stationaries from the phenolic and alcoholic glycosylation from Model-A<sub>C</sub> and Model-B<sub>C</sub>. The solvation effects were calculated using the SMD solvation model with  $\epsilon=78$ .

|                         |                   | E <sub>BS1</sub><br>(a.u.) | E <sub>solvation</sub><br>(a.u.) | E <sub>BS2</sub><br>(a.u.) | E <sub>ZPE</sub><br>(a.u.) | E<br>(a.u.)  | ΔE<br>(kcal/mol) |
|-------------------------|-------------------|----------------------------|----------------------------------|----------------------------|----------------------------|--------------|------------------|
| Phenolic glycosylation  | ES <sub>QC</sub>  | -2775.924509               | -2776.156672                     | -2778.671749               | 0.514545                   | -2778.389367 | 0                |
|                         | TS <sub>QC</sub>  | -2775.905777               | -2776.134291                     | -2778.653164               | 0.511730                   | -2778.369948 | 12.2             |
|                         | EP <sub>QC</sub>  | -2775.943864               | -2776.177497                     | -2778.687509               | 0.515550                   | -2778.405592 | -10.2            |
| Alcoholic glycosylation | ES' <sub>QC</sub> | -2775.925046               | -2776.151087                     | -2778.671777               | 0.515012                   | -2778.382778 | 4.1              |
|                         | TS' <sub>QC</sub> | -2775.880553               | -2776.115337                     | -2778.625713               | 0.511163                   | -2778.349334 | 25.1             |
|                         | EP' <sub>QC</sub> | -2775.935485               | -2776.168099                     | -2778.674999               | 0.515790                   | -2778.391823 | -1.5             |

### 3. Cartesian Coordinates

#### QM/MM Calculations

| ES |           |           |           |
|----|-----------|-----------|-----------|
| C  | 41.247197 | 41.506468 | 52.043255 |
| H  | 41.824883 | 42.402202 | 52.312661 |
| H  | 40.797584 | 41.159796 | 52.988410 |
| C  | 42.140786 | 40.438987 | 51.490888 |
| N  | 43.096523 | 39.820799 | 52.278221 |
| H  | 43.265304 | 39.969397 | 53.307957 |
| C  | 43.719019 | 38.887190 | 51.526081 |
| H  | 44.509463 | 38.241813 | 51.906082 |
| N  | 43.220744 | 38.853211 | 50.293759 |
| C  | 42.233737 | 39.817427 | 50.259126 |
| H  | 41.656275 | 39.994406 | 49.353300 |
| C  | 43.268744 | 41.393025 | 56.968233 |
| H  | 42.304903 | 41.889300 | 57.149816 |
| H  | 44.034748 | 42.158248 | 57.172203 |
| C  | 43.289950 | 41.075187 | 55.457977 |
| O  | 43.048198 | 42.059151 | 54.716801 |
| O  | 43.520140 | 39.910009 | 55.040476 |
| C  | 42.127234 | 32.776443 | 49.542814 |
| H  | 42.233173 | 32.151547 | 48.642784 |
| H  | 42.277590 | 33.810496 | 49.182039 |
| O  | 43.086885 | 32.393224 | 50.488896 |
| H  | 43.255044 | 33.195527 | 51.030783 |
| C  | 44.194488 | 44.210014 | 42.790966 |
| H  | 44.140104 | 43.494540 | 43.624753 |
| H  | 45.105559 | 44.821919 | 42.949661 |
| O  | 43.020649 | 44.988402 | 42.793341 |
| H  | 42.995458 | 45.530438 | 41.968905 |
| C  | 48.581854 | 49.236725 | 45.690515 |
| H  | 48.342643 | 50.032246 | 46.413220 |
| H  | 47.941490 | 49.384296 | 44.802545 |
| C  | 48.353672 | 47.859921 | 46.287023 |
| C  | 48.071798 | 47.691323 | 47.650847 |
| H  | 47.959071 | 48.569729 | 48.286534 |
| C  | 47.927854 | 46.423992 | 48.223610 |
| H  | 47.730808 | 46.317025 | 49.292257 |
| C  | 48.051847 | 45.276749 | 47.426924 |
| O  | 47.979057 | 44.020338 | 47.937650 |
| H  | 47.700726 | 44.030014 | 48.910183 |
| C  | 48.268154 | 45.427303 | 46.048046 |
| H  | 48.360543 | 44.538477 | 45.421050 |
| C  | 48.422001 | 46.698562 | 45.495586 |
| H  | 48.621169 | 46.778437 | 44.422896 |
| C  | 43.093562 | 36.467630 | 37.449154 |
| H  | 44.060126 | 35.973631 | 37.640510 |
| H  | 43.282952 | 37.205208 | 36.656888 |
| C  | 42.638151 | 37.065770 | 38.742279 |
| N  | 43.571418 | 37.292066 | 39.738337 |
| H  | 44.581958 | 37.160688 | 39.632761 |
| C  | 42.972694 | 37.726685 | 40.846153 |
| H  | 43.458208 | 37.944329 | 41.791378 |
| N  | 41.669348 | 37.809227 | 40.594519 |
| H  | 40.947076 | 38.054484 | 41.320493 |
| C  | 41.422831 | 37.412694 | 39.293510 |
| H  | 40.411089 | 37.477656 | 38.897891 |
| C  | 49.170436 | 36.787328 | 41.025293 |
| H  | 49.721809 | 37.232487 | 40.179786 |
| H  | 48.106451 | 36.989099 | 40.853666 |
| C  | 49.607828 | 37.445584 | 42.314323 |
| C  | 50.957228 | 37.561857 | 42.689484 |
| H  | 51.738069 | 37.129072 | 42.056058 |
| C  | 51.324913 | 38.252425 | 43.848082 |
| H  | 52.378828 | 38.335512 | 44.122786 |
| C  | 50.352853 | 38.875889 | 44.646629 |
| O  | 50.670748 | 39.693223 | 45.690731 |
| H  | 51.287818 | 39.260389 | 46.348562 |
| C  | 49.001477 | 38.719126 | 44.310190 |
| H  | 48.237107 | 39.148655 | 44.958590 |
| C  | 48.644047 | 37.999069 | 43.173099 |
| H  | 47.583633 | 37.842069 | 42.962289 |
| C  | 45.335849 | 31.772842 | 46.865854 |
| H  | 44.881899 | 31.394363 | 47.791741 |
| H  | 46.114829 | 32.498975 | 47.147136 |
| C  | 44.303247 | 32.542684 | 46.039148 |
| O  | 43.077909 | 32.354082 | 46.296985 |
| O  | 44.743442 | 33.362224 | 45.195297 |
| C  | 44.697051 | 33.799015 | 41.129375 |
| H  | 43.638951 | 33.922727 | 40.854140 |
| H  | 44.727413 | 33.716961 | 42.222964 |
| C  | 45.424000 | 35.053770 | 40.687666 |
| O  | 45.797407 | 35.255622 | 39.518942 |
| N  | 45.561387 | 35.985284 | 41.649216 |
| H  | 45.923947 | 36.898939 | 41.374928 |
| H  | 45.091172 | 35.892958 | 42.562345 |
| P  | 39.387055 | 39.613451 | 42.908140 |
| P  | 42.152957 | 40.336603 | 43.893188 |
| C  | 41.720664 | 36.472733 | 48.274675 |
| O  | 42.894112 | 36.368679 | 49.064283 |

|   |           |           |           |           |           |           |           |
|---|-----------|-----------|-----------|-----------|-----------|-----------|-----------|
| C | 41.990641 | 36.880838 | 46.828815 | H         | 44.167841 | 39.117831 | 48.781147 |
| O | 42.733399 | 38.115172 | 46.877607 | H         | 50.991118 | 37.391900 | 47.101188 |
| C | 42.713731 | 35.792486 | 46.015404 | O         | 44.968602 | 41.545260 | 45.184284 |
| O | 41.833343 | 34.702093 | 45.863536 | H         | 45.191175 | 42.040115 | 46.027092 |
| C | 43.167857 | 36.353634 | 44.655506 | H         | 45.819356 | 41.588166 | 44.687724 |
| O | 43.855521 | 35.407435 | 43.872440 | O         | 38.911745 | 39.207383 | 39.268276 |
| C | 44.037502 | 37.590604 | 44.911564 | H         | 38.856590 | 39.944823 | 38.641857 |
| O | 44.631058 | 38.101171 | 43.731517 | H         | 38.805533 | 39.633121 | 40.145034 |
| C | 43.223179 | 38.625225 | 45.700430 | O         | 43.134861 | 34.896992 | 51.524491 |
| O | 38.637789 | 40.369823 | 41.848142 | H         | 43.810740 | 35.314027 | 52.115896 |
| O | 43.063642 | 40.097310 | 42.713671 | H         | 43.138119 | 35.410490 | 50.691141 |
| O | 39.916417 | 38.226114 | 42.596942 | O         | 47.042269 | 43.876311 | 50.348598 |
| O | 42.503595 | 41.617971 | 44.732143 | H         | 46.395085 | 44.586898 | 50.573772 |
| O | 40.633864 | 40.586348 | 43.452477 | H         | 46.514231 | 43.051178 | 50.305317 |
| O | 42.078552 | 39.074418 | 44.880076 | O         | 45.623296 | 42.982737 | 47.257443 |
| C | 38.404937 | 40.482881 | 45.286732 | H         | 46.573350 | 43.227476 | 47.354521 |
| O | 38.531856 | 39.497394 | 44.297837 | H         | 45.406748 | 42.619597 | 48.151038 |
| H | 44.149320 | 38.885711 | 43.394964 | O         | 45.287579 | 41.874838 | 49.692899 |
| H | 42.313937 | 33.851630 | 46.029780 | H         | 45.056728 | 40.995708 | 49.315571 |
| H | 43.069993 | 37.264600 | 49.443960 | H         | 44.458225 | 42.320933 | 50.004108 |
| H | 41.019993 | 37.196291 | 48.723834 | H         | 40.445119 | 41.795014 | 51.363933 |
| H | 41.217945 | 35.496966 | 48.250649 | H         | 43.365738 | 40.597777 | 57.707313 |
| H | 41.016081 | 37.065034 | 46.343073 | H         | 41.093038 | 32.732977 | 49.884304 |
| H | 43.617750 | 35.488343 | 46.573493 | H         | 44.323695 | 43.639546 | 41.871217 |
| H | 42.265952 | 36.678947 | 44.103246 | H         | 49.613075 | 49.379410 | 45.367575 |
| H | 44.108512 | 34.610988 | 44.418860 | H         | 42.427024 | 35.709297 | 37.038393 |
| H | 44.864994 | 37.291814 | 45.578323 | H         | 49.272925 | 35.709876 | 40.896223 |
| H | 43.838288 | 39.499449 | 45.956598 | H         | 45.831055 | 30.940312 | 46.366123 |
| H | 38.180071 | 39.987653 | 46.241484 | H         | 45.043770 | 32.881633 | 40.653704 |
| H | 39.309537 | 41.097046 | 45.396614 | H         | 37.597026 | 41.192026 | 45.106569 |
| H | 43.535085 | 41.687174 | 44.857047 |           |           |           |           |
| C | 45.972833 | 38.797729 | 48.167028 | <b>TS</b> |           |           |           |
| C | 45.886325 | 37.410092 | 48.333630 | C         | 41.290464 | 41.557258 | 52.077903 |
| C | 47.041417 | 36.635773 | 48.220740 | H         | 41.829926 | 42.480618 | 52.329187 |
| C | 48.285746 | 37.209747 | 47.940400 | H         | 40.852209 | 41.207237 | 53.025519 |
| C | 48.346566 | 38.599869 | 47.755189 | C         | 42.257208 | 40.537990 | 51.567070 |
| C | 47.203522 | 39.392430 | 47.862737 | N         | 43.148175 | 39.903016 | 52.419867 |
| C | 49.524339 | 36.340691 | 47.864974 | H         | 43.221197 | 39.990757 | 53.488220 |
| O | 44.873940 | 39.599704 | 48.282388 | C         | 43.928729 | 39.085760 | 51.701993 |
| O | 50.401644 | 36.657171 | 46.807077 | H         | 44.709999 | 38.445777 | 52.105557 |
| H | 44.923700 | 36.937528 | 48.528508 | N         | 43.575574 | 39.165280 | 50.423299 |
| H | 46.963298 | 35.551887 | 48.345804 | C         | 42.537274 | 40.053374 | 50.308825 |
| H | 49.288783 | 39.077230 | 47.487789 | H         | 42.083040 | 40.262521 | 49.345315 |
| H | 47.237520 | 40.473685 | 47.709139 | C         | 43.236673 | 41.415431 | 57.005766 |
| H | 49.209778 | 35.290157 | 47.736738 | H         | 42.279920 | 41.917079 | 57.210332 |
| H | 50.051498 | 36.376765 | 48.840985 | H         | 44.010280 | 42.176667 | 57.193831 |

|   |           |           |           |   |           |           |           |
|---|-----------|-----------|-----------|---|-----------|-----------|-----------|
| C | 43.220484 | 41.096990 | 55.501703 | C | 51.062954 | 38.395474 | 43.946263 |
| O | 42.964901 | 42.066492 | 54.752310 | H | 52.089079 | 38.555626 | 44.284993 |
| O | 43.438152 | 39.923378 | 55.083495 | C | 49.996982 | 38.869747 | 44.726754 |
| C | 42.305486 | 32.631259 | 49.716225 | O | 50.171468 | 39.651379 | 45.827976 |
| H | 42.450261 | 31.954489 | 48.859495 | H | 50.931620 | 39.345923 | 46.405634 |
| H | 42.523569 | 33.635141 | 49.318642 | C | 48.684741 | 38.584631 | 44.327125 |
| O | 43.184372 | 32.271752 | 50.745469 | H | 47.851240 | 38.897047 | 44.958065 |
| H | 43.354230 | 33.097343 | 51.249474 | C | 48.457336 | 37.879934 | 43.150621 |
| C | 44.141801 | 44.011999 | 42.938023 | H | 47.431452 | 37.610764 | 42.887892 |
| H | 43.945921 | 43.227401 | 43.685220 | C | 45.435111 | 31.771092 | 46.888611 |
| H | 45.081919 | 44.524121 | 43.225614 | H | 44.985492 | 31.379557 | 47.811504 |
| O | 43.037765 | 44.886106 | 42.917007 | H | 46.216112 | 32.494258 | 47.174995 |
| H | 43.062934 | 45.429781 | 42.094643 | C | 44.388821 | 32.536199 | 46.071004 |
| C | 48.642981 | 49.236677 | 45.685601 | O | 43.168006 | 32.305840 | 46.330743 |
| H | 48.384719 | 50.010971 | 46.424022 | O | 44.798820 | 33.381070 | 45.239267 |
| H | 48.000243 | 49.391853 | 44.800741 | C | 44.699385 | 33.820003 | 41.166712 |
| C | 48.438889 | 47.841298 | 46.244174 | H | 43.626602 | 33.918527 | 40.943100 |
| C | 48.044591 | 47.628428 | 47.572969 | H | 44.785020 | 33.757384 | 42.260648 |
| H | 47.860039 | 48.487606 | 48.219826 | C | 45.388290 | 35.081694 | 40.672182 |
| C | 47.865038 | 46.340155 | 48.091162 | O | 45.822121 | 35.225631 | 39.521705 |
| H | 47.560016 | 46.196829 | 49.129476 | N | 45.445333 | 36.075305 | 41.587137 |
| C | 48.069735 | 45.217842 | 47.275444 | H | 45.795296 | 36.977481 | 41.265583 |
| O | 47.899820 | 43.947265 | 47.711490 | H | 44.996861 | 36.006388 | 42.510395 |
| H | 47.543943 | 43.893657 | 48.657393 | P | 39.341277 | 39.618263 | 42.721811 |
| C | 48.455561 | 45.413889 | 45.937608 | P | 41.980460 | 40.241742 | 43.943117 |
| H | 48.631434 | 44.548200 | 45.299299 | C | 41.626664 | 35.966591 | 48.453498 |
| C | 48.627614 | 46.701921 | 45.438840 | O | 42.885905 | 35.887462 | 49.085520 |
| H | 48.928380 | 46.814296 | 44.392789 | C | 41.728859 | 36.475976 | 47.025720 |
| C | 43.168086 | 36.438059 | 37.523508 | O | 42.144501 | 37.867803 | 47.155480 |
| H | 44.119060 | 35.937816 | 37.774315 | C | 42.633906 | 35.628587 | 46.122833 |
| H | 43.402973 | 37.166147 | 36.731357 | O | 41.872767 | 34.519477 | 45.729069 |
| C | 42.650935 | 37.085924 | 38.765641 | C | 43.190313 | 36.436183 | 44.931919 |
| N | 43.525426 | 37.663978 | 39.673082 | O | 43.972569 | 35.631048 | 44.083739 |
| H | 44.536382 | 37.782199 | 39.554788 | C | 44.015460 | 37.583132 | 45.554742 |
| C | 42.850612 | 38.135361 | 40.726806 | O | 44.648738 | 38.481738 | 44.674014 |
| H | 43.238539 | 38.702241 | 41.580022 | C | 43.180811 | 38.327974 | 46.573436 |
| N | 41.562946 | 37.876757 | 40.530669 | O | 38.509120 | 40.318448 | 41.680158 |
| H | 40.799398 | 38.063560 | 41.257981 | O | 43.142348 | 40.032798 | 42.964489 |
| C | 41.399964 | 37.238833 | 39.322336 | O | 39.810146 | 38.196694 | 42.432930 |
| H | 40.401909 | 37.008823 | 38.958732 | O | 42.147887 | 41.662915 | 44.694586 |
| C | 49.180722 | 36.811786 | 40.987369 | O | 40.625608 | 40.586585 | 43.063149 |
| H | 49.795204 | 37.256286 | 40.186614 | O | 41.709145 | 39.121501 | 44.918357 |
| H | 48.130779 | 37.011065 | 40.733659 | C | 38.506883 | 40.513068 | 45.149314 |
| C | 49.506042 | 37.470468 | 42.309260 | O | 38.564832 | 39.525148 | 44.164036 |
| C | 50.817479 | 37.718800 | 42.744082 | H | 44.017177 | 38.882369 | 44.027184 |
| H | 51.664716 | 37.395164 | 42.131360 | H | 42.367884 | 33.680515 | 45.945096 |

|   |           |           |           |           |           |           |           |
|---|-----------|-----------|-----------|-----------|-----------|-----------|-----------|
| H | 43.440992 | 36.684927 | 48.846610 | H         | 44.367226 | 42.161735 | 49.347505 |
| H | 40.934471 | 36.628272 | 49.001408 | H         | 40.481942 | 41.804571 | 51.390011 |
| H | 41.175727 | 34.966036 | 48.425236 | H         | 43.344597 | 40.614350 | 57.736990 |
| H | 40.735184 | 36.526142 | 46.564665 | H         | 41.249561 | 32.634727 | 49.986553 |
| H | 43.502502 | 35.295136 | 46.717030 | H         | 44.294453 | 43.510850 | 41.982191 |
| H | 42.358920 | 36.875044 | 44.354820 | H         | 49.673064 | 49.401083 | 45.369425 |
| H | 44.225432 | 34.786543 | 44.544264 | H         | 42.505267 | 35.690719 | 37.087364 |
| H | 44.837461 | 37.097991 | 46.107440 | H         | 49.293237 | 35.734457 | 40.865836 |
| H | 43.370765 | 39.383764 | 46.747770 | H         | 45.929384 | 30.939331 | 46.386680 |
| H | 38.363790 | 40.024658 | 46.123889 | H         | 45.042278 | 32.900169 | 40.693008 |
| H | 39.407653 | 41.143182 | 45.187346 | H         | 37.675730 | 41.207180 | 45.024976 |
| H | 42.989477 | 41.623409 | 45.224208 |           |           |           |           |
| C | 45.685365 | 37.525613 | 48.244636 | <b>EP</b> |           |           |           |
| C | 46.015075 | 36.160030 | 48.373699 | C         | 41.339385 | 41.483793 | 51.939406 |
| C | 47.335696 | 35.744311 | 48.227636 | H         | 41.913674 | 42.377360 | 52.220160 |
| C | 48.361514 | 36.653053 | 47.954168 | H         | 40.920347 | 41.102063 | 52.883454 |
| C | 48.034506 | 38.012748 | 47.827741 | C         | 42.243870 | 40.449255 | 51.345954 |
| C | 46.718451 | 38.448466 | 47.971103 | N         | 43.173381 | 39.767767 | 52.125688 |
| C | 49.781264 | 36.156895 | 47.828232 | H         | 43.296129 | 39.853125 | 53.193091 |
| O | 44.412869 | 37.922023 | 48.352116 | C         | 43.846649 | 38.905245 | 51.357910 |
| O | 50.489459 | 36.663318 | 46.715318 | H         | 44.612779 | 38.212384 | 51.700048 |
| H | 45.222497 | 35.441814 | 48.592159 | N         | 43.377921 | 39.002332 | 50.110253 |
| H | 47.576546 | 34.681098 | 48.300645 | C         | 42.386145 | 39.951856 | 50.070572 |
| H | 48.812276 | 38.738406 | 47.583091 | H         | 41.877619 | 40.187752 | 49.140851 |
| H | 46.456285 | 39.504640 | 47.875961 | C         | 43.212833 | 41.293608 | 56.804500 |
| H | 49.754093 | 35.054931 | 47.744949 | H         | 42.234063 | 41.770228 | 56.963638 |
| H | 50.323688 | 36.376340 | 48.769128 | H         | 43.952890 | 42.087045 | 56.994875 |
| H | 44.025849 | 38.671915 | 49.569328 | C         | 43.254159 | 40.968900 | 55.293202 |
| H | 50.996691 | 37.455338 | 47.007936 | O         | 43.052473 | 41.955422 | 54.549301 |
| O | 44.495898 | 41.185598 | 46.015758 | O         | 43.450747 | 39.798081 | 54.857699 |
| H | 45.247195 | 41.835180 | 45.855205 | C         | 42.256459 | 32.630287 | 49.726881 |
| H | 44.791244 | 40.352144 | 45.595614 | H         | 42.395886 | 31.965070 | 48.860958 |
| O | 38.948856 | 39.096193 | 39.154783 | H         | 42.482986 | 33.636811 | 49.342347 |
| H | 38.902011 | 39.827984 | 38.521348 | O         | 43.134534 | 32.240704 | 50.748158 |
| H | 38.748751 | 39.525189 | 40.014638 | H         | 43.273874 | 33.029851 | 51.313160 |
| O | 43.274359 | 34.827375 | 51.659110 | C         | 44.094433 | 43.926533 | 43.025463 |
| H | 43.949079 | 35.300100 | 52.204106 | H         | 43.852271 | 43.135107 | 43.750911 |
| H | 43.226643 | 35.297215 | 50.800577 | H         | 45.047663 | 44.398485 | 43.339624 |
| O | 46.806952 | 43.561209 | 50.000572 | O         | 43.025924 | 44.844380 | 43.000848 |
| H | 46.214410 | 44.284752 | 50.303808 | H         | 43.063206 | 45.376422 | 42.171886 |
| H | 46.222538 | 42.837367 | 49.680274 | C         | 48.631455 | 49.198650 | 45.711978 |
| O | 46.465849 | 42.873675 | 45.695323 | H         | 48.366673 | 49.987696 | 46.432311 |
| H | 47.241788 | 42.477063 | 45.204091 | H         | 47.985037 | 49.326390 | 44.825393 |
| H | 46.897321 | 43.131010 | 46.547872 | C         | 48.437240 | 47.816533 | 46.308746 |
| O | 45.066275 | 41.608866 | 48.922431 | C         | 48.022591 | 47.642676 | 47.637403 |
| H | 44.806346 | 41.510579 | 47.985957 | H         | 47.819946 | 48.519895 | 48.253434 |

|   |           |           |           |   |           |           |           |
|---|-----------|-----------|-----------|---|-----------|-----------|-----------|
| C | 47.844459 | 46.370766 | 48.195055 | O | 45.766514 | 35.213968 | 39.567341 |
| H | 47.522384 | 46.259843 | 49.232117 | N | 45.363175 | 36.045652 | 41.637581 |
| C | 48.070075 | 45.224312 | 47.420195 | H | 45.691311 | 36.960652 | 41.333343 |
| O | 47.904293 | 43.966284 | 47.895471 | H | 44.865174 | 35.969963 | 42.534900 |
| H | 47.513552 | 43.933641 | 48.829247 | P | 39.263265 | 39.617245 | 42.675956 |
| C | 48.471554 | 45.379599 | 46.081615 | P | 41.831876 | 40.242819 | 44.013471 |
| H | 48.656898 | 44.493387 | 45.473954 | C | 41.849547 | 36.136812 | 48.549185 |
| C | 48.645622 | 46.652493 | 45.543900 | O | 43.036242 | 35.775664 | 49.261762 |
| H | 48.960114 | 46.731920 | 44.498947 | C | 42.204801 | 36.688542 | 47.178895 |
| C | 43.148930 | 36.456058 | 37.588357 | O | 43.251029 | 37.639108 | 47.461798 |
| H | 44.097175 | 35.957026 | 37.851891 | C | 42.738803 | 35.632161 | 46.197771 |
| H | 43.396444 | 37.190964 | 36.806506 | O | 41.772470 | 34.636510 | 45.982945 |
| C | 42.608610 | 37.090309 | 38.828188 | C | 43.192711 | 36.319538 | 44.892996 |
| N | 43.466697 | 37.649139 | 39.762998 | O | 43.658673 | 35.389146 | 43.938725 |
| H | 44.479105 | 37.772061 | 39.657940 | C | 44.309053 | 37.327044 | 45.224303 |
| C | 42.772571 | 38.098668 | 40.814257 | O | 44.766498 | 38.065373 | 44.119563 |
| H | 43.147295 | 38.628044 | 41.696006 | C | 43.862887 | 38.278917 | 46.351748 |
| N | 41.488838 | 37.847957 | 40.587411 | O | 38.451823 | 40.308114 | 41.610512 |
| H | 40.708546 | 38.025931 | 41.304869 | O | 43.065157 | 39.958502 | 43.143760 |
| C | 41.347690 | 37.235808 | 39.363375 | O | 39.691658 | 38.173735 | 42.427290 |
| H | 40.355918 | 37.019584 | 38.975053 | O | 41.960183 | 41.728192 | 44.652512 |
| C | 49.023992 | 36.795142 | 41.202471 | O | 40.570750 | 40.556944 | 42.980603 |
| H | 49.592449 | 37.283491 | 40.393404 | O | 41.408442 | 39.223627 | 45.038730 |
| H | 47.958974 | 36.959429 | 40.995098 | C | 38.464950 | 40.567205 | 45.099654 |
| C | 49.377320 | 37.422213 | 42.534425 | O | 38.478641 | 39.580490 | 44.113236 |
| C | 50.700150 | 37.663236 | 42.941864 | H | 44.098438 | 38.739766 | 43.831654 |
| H | 51.530976 | 37.365875 | 42.294027 | H | 42.219316 | 33.757046 | 46.090875 |
| C | 50.980148 | 38.307770 | 44.155658 | H | 43.755338 | 36.318725 | 48.904760 |
| H | 52.015343 | 38.487551 | 44.457368 | H | 41.283243 | 36.899013 | 49.111306 |
| C | 49.933981 | 38.751890 | 44.982496 | H | 41.214867 | 35.249617 | 48.434401 |
| O | 50.128942 | 39.512190 | 46.089184 | H | 41.338188 | 37.204476 | 46.736564 |
| H | 50.960844 | 39.272805 | 46.598063 | H | 43.633707 | 35.175419 | 46.660030 |
| C | 48.610867 | 38.474820 | 44.605114 | H | 42.335995 | 36.868728 | 44.463531 |
| H | 47.791752 | 38.786477 | 45.253842 | H | 43.998392 | 34.583051 | 44.410156 |
| C | 48.348799 | 37.805146 | 43.414892 | H | 45.167005 | 36.721247 | 45.548993 |
| H | 47.310175 | 37.564145 | 43.174824 | H | 43.135943 | 38.984796 | 45.935829 |
| C | 45.317716 | 31.725065 | 46.892117 | H | 38.367855 | 40.083518 | 46.081954 |
| H | 44.861242 | 31.348509 | 47.817413 | H | 39.361090 | 41.203783 | 45.100470 |
| H | 46.107131 | 32.439116 | 47.176397 | H | 42.705558 | 41.758140 | 45.307995 |
| C | 44.289680 | 32.503185 | 46.062452 | C | 45.977084 | 38.474324 | 47.514856 |
| O | 43.064448 | 32.312382 | 46.326989 | C | 46.045584 | 37.109417 | 47.828587 |
| O | 44.730652 | 33.323588 | 45.220218 | C | 47.221225 | 36.589930 | 48.362387 |
| C | 44.667495 | 33.782720 | 41.206476 | C | 48.323118 | 37.403379 | 48.617488 |
| H | 43.587440 | 33.864933 | 41.015781 | C | 48.205513 | 38.781870 | 48.381494 |
| H | 44.785705 | 33.714623 | 42.296104 | C | 47.045819 | 39.321841 | 47.832004 |
| C | 45.327601 | 35.060271 | 40.715292 | C | 49.640183 | 36.765651 | 48.963064 |



|            |           |           |           |   |           |           |           |
|------------|-----------|-----------|-----------|---|-----------|-----------|-----------|
| O          | 44.904015 | 39.059933 | 46.892580 | C | 44.247487 | 38.209173 | 49.400755 |
| O          | 50.492146 | 36.703000 | 47.836769 | H | 44.971254 | 37.532993 | 49.854666 |
| H          | 45.230181 | 36.434036 | 47.601054 | N | 43.849942 | 38.181193 | 48.128631 |
| H          | 47.289336 | 35.515535 | 48.551653 | C | 42.899676 | 39.185739 | 48.020885 |
| H          | 49.052166 | 39.443325 | 48.576032 | H | 42.405835 | 39.391340 | 47.073030 |
| H          | 46.964474 | 40.384750 | 47.597533 | C | 43.940370 | 41.129521 | 54.555552 |
| H          | 49.464216 | 35.727677 | 49.285843 | H | 42.996141 | 41.597641 | 54.883767 |
| H          | 50.100209 | 37.287283 | 49.821033 | H | 44.719686 | 41.898399 | 54.659504 |
| H          | 43.667354 | 38.480552 | 49.275977 | C | 43.792331 | 40.790856 | 53.068284 |
| H          | 50.995405 | 37.544368 | 47.744957 | O | 43.769905 | 41.776268 | 52.287713 |
| O          | 44.081494 | 41.667993 | 46.430582 | O | 43.666394 | 39.589626 | 52.705351 |
| H          | 44.905980 | 42.158839 | 46.157864 | C | 42.511822 | 32.395616 | 48.605391 |
| H          | 44.407842 | 40.748195 | 46.491788 | H | 42.908178 | 33.417709 | 48.481357 |
| O          | 38.920576 | 39.079292 | 39.104899 | H | 42.749394 | 32.056980 | 49.629213 |
| H          | 38.888658 | 39.815454 | 38.475654 | O | 43.082212 | 31.517095 | 47.639884 |
| H          | 38.708799 | 39.505771 | 39.964082 | H | 43.726571 | 32.074026 | 47.136497 |
| O          | 43.199946 | 34.755653 | 51.857901 | C | 45.221489 | 43.060379 | 40.752957 |
| H          | 43.911756 | 35.203378 | 52.374533 | H | 45.160561 | 42.284695 | 41.532271 |
| H          | 43.199598 | 35.197314 | 50.985199 | H | 46.158760 | 43.616417 | 40.921313 |
| O          | 46.727410 | 43.616169 | 50.144452 | O | 44.080799 | 43.877182 | 40.893890 |
| H          | 46.157293 | 44.362791 | 50.437199 | H | 44.214938 | 44.729113 | 40.425395 |
| H          | 46.114910 | 42.906833 | 49.839001 | C | 47.694702 | 47.158874 | 42.148984 |
| O          | 46.414053 | 42.832317 | 45.957978 | H | 47.086027 | 47.698146 | 42.889147 |
| H          | 47.149363 | 42.378737 | 45.459660 | H | 47.189910 | 47.247687 | 41.173094 |
| H          | 46.886566 | 43.137133 | 46.770469 | C | 47.833207 | 45.698609 | 42.529956 |
| O          | 44.866747 | 41.722485 | 49.193845 | C | 47.336467 | 45.202720 | 43.745734 |
| H          | 44.574289 | 41.782542 | 48.258809 | H | 46.850976 | 45.885185 | 44.448306 |
| H          | 44.243701 | 42.339394 | 49.661085 | C | 47.440500 | 43.849013 | 44.079478 |
| H          | 40.516888 | 41.780560 | 51.288641 | H | 47.036625 | 43.476496 | 45.022291 |
| H          | 43.323546 | 40.530167 | 57.574543 | C | 48.054249 | 42.952204 | 43.197959 |
| H          | 41.200291 | 32.637035 | 49.996194 | O | 48.095327 | 41.628223 | 43.524474 |
| H          | 44.244106 | 43.438909 | 42.062194 | H | 48.789668 | 41.164641 | 42.978660 |
| H          | 49.658146 | 49.369901 | 45.388489 | C | 48.566697 | 43.431757 | 41.981949 |
| H          | 42.497689 | 35.709577 | 37.133695 | H | 49.032139 | 42.738877 | 41.282363 |
| H          | 49.172306 | 35.726396 | 41.048031 | C | 48.443796 | 44.782868 | 41.655852 |
| H          | 45.803121 | 30.883752 | 46.397506 | H | 48.809938 | 45.124930 | 40.683843 |
| H          | 45.018907 | 32.873216 | 40.719262 | C | 43.403654 | 35.430327 | 35.695014 |
| H          | 37.623456 | 41.252896 | 45.000749 | H | 44.369230 | 34.939978 | 35.911415 |
|            |           |           |           | H | 43.589774 | 36.181751 | 34.912331 |
| <b>ES'</b> |           |           |           | C | 42.933606 | 36.089936 | 36.951294 |
| C          | 41.917060 | 40.952128 | 49.768125 | N | 43.817365 | 36.812622 | 37.738422 |
| H          | 42.552246 | 41.827120 | 49.967139 | H | 44.817399 | 36.964171 | 37.580230 |
| H          | 41.507016 | 40.667258 | 50.750128 | C | 43.183924 | 37.298037 | 38.811685 |
| C          | 42.747253 | 39.819277 | 49.241230 | H | 43.612291 | 37.926621 | 39.594529 |
| N          | 43.613928 | 39.171705 | 50.097032 | N | 41.913239 | 36.923460 | 38.749844 |
| H          | 43.683167 | 39.367589 | 51.150183 | H | 41.236686 | 37.188375 | 39.569033 |

|   |           |           |           |   |           |           |           |
|---|-----------|-----------|-----------|---|-----------|-----------|-----------|
| C | 41.721767 | 36.178704 | 37.604072 | O | 40.692084 | 37.632206 | 40.860032 |
| H | 40.739269 | 35.805407 | 37.322817 | O | 43.255987 | 41.046371 | 42.875781 |
| C | 49.096972 | 35.059320 | 39.337302 | O | 41.410302 | 40.052547 | 41.553973 |
| H | 49.526942 | 35.345751 | 38.363987 | O | 42.688861 | 38.530683 | 43.093897 |
| H | 48.027389 | 35.309839 | 39.308230 | C | 39.050115 | 40.147239 | 43.196897 |
| C | 49.811348 | 35.844682 | 40.410005 | O | 39.251048 | 39.041150 | 42.360562 |
| C | 51.211452 | 35.952805 | 40.407499 | H | 44.626798 | 37.890648 | 41.496567 |
| H | 51.799434 | 35.407448 | 39.664812 | H | 41.659648 | 33.596867 | 43.768268 |
| C | 51.874619 | 36.789517 | 41.302712 | H | 43.564312 | 36.484347 | 47.358044 |
| H | 52.962507 | 36.882734 | 41.267306 | H | 41.454908 | 36.890361 | 46.979177 |
| C | 51.137079 | 37.555188 | 42.214913 | H | 41.225237 | 35.216978 | 46.392623 |
| O | 51.723685 | 38.487057 | 43.017486 | H | 41.266181 | 36.974262 | 44.557434 |
| H | 52.712390 | 38.327948 | 43.085837 | H | 43.304357 | 34.734399 | 44.661648 |
| C | 49.743681 | 37.421287 | 42.270635 | H | 42.424657 | 36.179002 | 42.133873 |
| H | 49.182342 | 37.996499 | 43.006560 | H | 43.912033 | 33.847575 | 42.745042 |
| C | 49.095058 | 36.569391 | 41.377201 | H | 45.050458 | 36.208038 | 43.700878 |
| H | 48.004392 | 36.480212 | 41.421838 | H | 44.553964 | 38.605594 | 44.048121 |
| C | 43.568882 | 30.369946 | 44.541372 | H | 38.829373 | 39.782328 | 44.210144 |
| H | 43.001119 | 29.632579 | 43.955616 | H | 39.920875 | 40.815209 | 43.232047 |
| H | 43.093937 | 30.398059 | 45.536167 | H | 44.200467 | 41.012915 | 43.302567 |
| C | 43.298773 | 31.752448 | 43.931779 | C | 49.564566 | 36.610633 | 45.677798 |
| O | 44.222630 | 32.619012 | 43.835645 | C | 48.256422 | 36.270735 | 46.072042 |
| O | 42.102864 | 31.951474 | 43.626484 | C | 47.360553 | 37.254454 | 46.490855 |
| C | 44.602605 | 32.558669 | 39.505130 | C | 47.736165 | 38.609071 | 46.528308 |
| H | 43.531256 | 32.695634 | 39.305382 | C | 49.029013 | 38.941405 | 46.100210 |
| H | 44.713356 | 32.591259 | 40.597086 | C | 49.937347 | 37.964868 | 45.685646 |
| C | 45.344053 | 33.755185 | 38.911022 | C | 46.809121 | 39.672891 | 47.071108 |
| O | 45.864750 | 33.766444 | 37.788998 | O | 50.392335 | 35.620606 | 45.281724 |
| N | 45.346576 | 34.833329 | 39.723010 | O | 45.520620 | 39.721913 | 46.456288 |
| H | 45.781014 | 35.696602 | 39.402624 | H | 47.968210 | 35.217454 | 46.061447 |
| H | 44.863043 | 34.842784 | 40.631605 | H | 46.352431 | 36.960402 | 46.799601 |
| P | 40.163812 | 39.049807 | 41.000321 | H | 49.331064 | 39.992940 | 46.073791 |
| P | 42.879876 | 39.747930 | 42.078373 | H | 50.920282 | 38.250604 | 45.308232 |
| C | 41.927510 | 36.064434 | 46.419315 | H | 47.265981 | 40.664623 | 46.927729 |
| O | 43.123130 | 35.653719 | 47.050855 | H | 46.669181 | 39.534095 | 48.159815 |
| C | 42.174006 | 36.504830 | 44.977075 | H | 51.349064 | 35.912585 | 45.307725 |
| O | 43.228807 | 37.478917 | 45.041026 | H | 44.969180 | 38.985317 | 46.811353 |
| C | 42.541908 | 35.302722 | 44.102756 | O | 45.514800 | 40.697850 | 43.928507 |
| O | 41.376819 | 34.531464 | 43.935566 | H | 45.498095 | 40.392591 | 44.869204 |
| C | 43.187405 | 35.691614 | 42.765308 | H | 46.437567 | 40.978155 | 43.732366 |
| O | 43.670627 | 34.550707 | 42.079916 | O | 50.077210 | 40.610998 | 42.105579 |
| C | 44.314427 | 36.691634 | 43.034479 | H | 50.179067 | 40.674749 | 41.130034 |
| O | 45.016007 | 37.074629 | 41.871623 | H | 50.774467 | 40.015140 | 42.439761 |
| C | 43.761842 | 37.874118 | 43.840116 | H | 41.095846 | 41.263144 | 49.122414 |
| O | 39.529714 | 39.743730 | 39.843601 | H | 44.160219 | 40.326659 | 55.259218 |
| O | 43.823670 | 39.383554 | 40.951327 | H | 41.429661 | 32.504429 | 48.533602 |

|            |           |           |           |   |           |           |           |
|------------|-----------|-----------|-----------|---|-----------|-----------|-----------|
| H          | 45.287978 | 42.544499 | 39.795088 | H | 48.681180 | 41.162683 | 42.954615 |
| H          | 48.662233 | 47.655037 | 42.073008 | C | 48.452515 | 43.427891 | 41.949721 |
| H          | 42.751432 | 34.676797 | 35.253578 | H | 48.799261 | 42.714913 | 41.202827 |
| H          | 49.156471 | 33.971243 | 39.362109 | C | 48.351989 | 44.781320 | 41.629820 |
| H          | 44.578515 | 29.989458 | 44.696087 | H | 48.628983 | 45.106103 | 40.623253 |
| H          | 44.887692 | 31.579790 | 39.119658 | C | 43.431292 | 35.468014 | 35.620431 |
| H          | 38.212763 | 40.785111 | 42.914006 | H | 44.404637 | 34.992810 | 35.832954 |
| <b>TS'</b> |           |           |           | H | 43.602845 | 36.215085 | 34.830581 |
| C          | 41.844228 | 41.030570 | 49.799576 | C | 42.944358 | 36.118505 | 36.875472 |
| H          | 42.480104 | 41.902214 | 50.007588 | N | 43.804207 | 36.828795 | 37.698092 |
| H          | 41.424591 | 40.744789 | 50.776936 | H | 44.805678 | 36.990816 | 37.563815 |
| C          | 42.673498 | 39.892972 | 49.282992 | C | 43.136257 | 37.290745 | 38.767973 |
| N          | 43.509036 | 39.217551 | 50.150180 | H | 43.536865 | 37.913743 | 39.581565 |
| H          | 43.578671 | 39.418309 | 51.218537 | N | 41.870148 | 36.912334 | 38.664112 |
| C          | 44.130025 | 38.245618 | 49.463604 | H | 41.108615 | 37.159807 | 39.495359 |
| H          | 44.839464 | 37.556151 | 49.919930 | C | 41.716925 | 36.194436 | 37.499769 |
| N          | 43.749886 | 38.238756 | 48.183693 | H | 40.742779 | 35.825644 | 37.185026 |
| C          | 42.834595 | 39.272277 | 48.055003 | C | 49.166732 | 35.016761 | 39.264698 |
| H          | 42.340035 | 39.465762 | 47.104951 | H | 49.620164 | 35.287573 | 38.296940 |
| C          | 43.913473 | 41.152669 | 54.582747 | H | 48.099966 | 35.276151 | 39.205253 |
| H          | 42.982560 | 41.631552 | 54.932438 | C | 49.860270 | 35.819932 | 40.336748 |
| H          | 44.703486 | 41.912055 | 54.674054 | C | 51.260662 | 35.911429 | 40.383197 |
| C          | 43.729446 | 40.831024 | 53.099322 | H | 51.869257 | 35.332545 | 39.684298 |
| O          | 43.687018 | 41.821726 | 52.328123 | C | 51.901472 | 36.772969 | 41.272179 |
| O          | 43.596051 | 39.632045 | 52.722251 | H | 52.991226 | 36.849183 | 41.275390 |
| C          | 42.462223 | 32.361458 | 48.662285 | C | 51.141382 | 37.584093 | 42.124379 |
| H          | 42.866155 | 33.384404 | 48.589144 | O | 51.709332 | 38.528278 | 42.927584 |
| H          | 42.683560 | 31.975837 | 49.672091 | H | 52.696337 | 38.374101 | 43.020493 |
| O          | 43.038233 | 31.520202 | 47.668568 | C | 49.744476 | 37.472220 | 42.126418 |
| H          | 43.656791 | 32.104411 | 47.165521 | H | 49.156152 | 38.083525 | 42.807139 |
| C          | 45.150828 | 43.091194 | 40.758499 | C | 49.119896 | 36.590776 | 41.246851 |
| H          | 45.109711 | 42.327893 | 41.547880 | H | 48.028255 | 36.509512 | 41.262942 |
| H          | 46.098730 | 43.639586 | 40.885577 | C | 43.534537 | 30.535013 | 44.494217 |
| O          | 44.028919 | 43.927725 | 40.936211 | H | 42.976204 | 29.816468 | 43.877050 |
| H          | 44.143384 | 44.760086 | 40.428977 | H | 43.019690 | 30.560094 | 45.469756 |
| C          | 47.713240 | 47.177062 | 42.160423 | C | 43.316263 | 31.931592 | 43.890967 |
| H          | 47.110619 | 47.722213 | 42.901378 | O | 44.246204 | 32.794776 | 43.863272 |
| H          | 47.203830 | 47.256693 | 41.186560 | O | 42.139620 | 32.141421 | 43.523223 |
| C          | 47.860478 | 45.721235 | 42.551554 | C | 44.639002 | 32.617351 | 39.591742 |
| C          | 47.499713 | 45.255288 | 43.825523 | H | 43.560896 | 32.779697 | 39.457646 |
| H          | 47.122113 | 45.961683 | 44.570764 | H | 44.812810 | 32.638828 | 40.677145 |
| C          | 47.602731 | 43.901388 | 44.160643 | C | 45.375547 | 33.805197 | 38.972503 |
| H          | 47.331453 | 43.550595 | 45.158006 | O | 45.913841 | 33.788167 | 37.861498 |
| C          | 48.049010 | 42.970164 | 43.214585 | N | 45.368037 | 34.911542 | 39.753767 |
| O          | 48.020267 | 41.644213 | 43.523865 | H | 45.780379 | 35.765305 | 39.378060 |
|            |           |           |           | H | 44.864031 | 34.971047 | 40.648206 |

|   |           |           |           |            |           |           |           |
|---|-----------|-----------|-----------|------------|-----------|-----------|-----------|
| P | 39.948736 | 38.962747 | 40.637819 | H          | 48.753688 | 39.353070 | 45.402678 |
| P | 42.543944 | 39.704418 | 41.863946 | H          | 50.788676 | 37.971866 | 45.082471 |
| C | 41.547736 | 36.000269 | 46.491973 | H          | 46.139594 | 39.265747 | 45.204713 |
| O | 42.731745 | 35.600335 | 47.165058 | H          | 46.228525 | 39.065780 | 46.960345 |
| C | 41.852465 | 36.542209 | 45.099442 | H          | 51.693909 | 35.739422 | 45.269626 |
| O | 42.731450 | 37.674867 | 45.289435 | H          | 44.514706 | 37.840214 | 46.867977 |
| C | 42.413240 | 35.449884 | 44.195063 | O          | 45.088954 | 41.303040 | 43.827582 |
| O | 41.314633 | 34.657351 | 43.832250 | H          | 45.011004 | 42.072865 | 44.444357 |
| C | 43.206551 | 35.992404 | 43.002621 | H          | 46.041883 | 41.263254 | 43.611357 |
| O | 43.727921 | 34.922905 | 42.232175 | O          | 49.995070 | 40.637660 | 42.076645 |
| C | 44.344306 | 36.879146 | 43.558411 | H          | 50.084947 | 40.690125 | 41.097951 |
| O | 45.125854 | 37.517837 | 42.597696 | H          | 50.703650 | 40.050824 | 42.401966 |
| C | 43.824335 | 37.872686 | 44.608569 | H          | 41.030113 | 41.339634 | 49.144014 |
| O | 39.165225 | 39.542244 | 39.504073 | H          | 44.137287 | 40.343747 | 55.278174 |
| O | 43.704885 | 39.200546 | 40.994408 | H          | 41.382263 | 32.484179 | 48.580472 |
| O | 40.395505 | 37.498346 | 40.572176 | H          | 45.184334 | 42.563655 | 39.805270 |
| O | 42.812465 | 41.252483 | 42.256082 | H          | 48.681896 | 47.669600 | 42.075703 |
| O | 41.251843 | 39.949859 | 40.869329 | H          | 42.783930 | 34.703455 | 35.190969 |
| O | 42.141796 | 38.867358 | 43.045568 | H          | 49.214233 | 33.928597 | 39.306042 |
| C | 39.163763 | 40.167490 | 42.925095 | H          | 44.528359 | 30.132015 | 44.689093 |
| O | 39.190021 | 39.046749 | 42.094073 | H          | 44.883604 | 31.638401 | 39.179562 |
| H | 44.566813 | 38.097839 | 42.019072 | H          | 38.285845 | 40.796924 | 42.779702 |
| H | 41.654130 | 33.743358 | 43.642359 |            |           |           |           |
| H | 43.140839 | 36.404180 | 47.541433 | <b>EP'</b> |           |           |           |
| H | 40.997760 | 36.759566 | 47.074455 | C          | 41.821908 | 41.012525 | 49.744178 |
| H | 40.899121 | 35.120110 | 46.373346 | H          | 42.384145 | 41.906007 | 50.052388 |
| H | 40.953372 | 36.956406 | 44.618060 | H          | 41.393351 | 40.615895 | 50.678615 |
| H | 43.128397 | 34.860333 | 44.796317 | C          | 42.776282 | 40.010854 | 49.175424 |
| H | 42.543017 | 36.592000 | 42.362472 | N          | 43.700832 | 39.418448 | 50.018641 |
| H | 43.962061 | 34.167904 | 42.834812 | H          | 43.732701 | 39.572554 | 51.125936 |
| H | 45.016597 | 36.197418 | 44.104308 | C          | 44.490448 | 38.619546 | 49.303281 |
| H | 44.076757 | 38.924512 | 44.457134 | H          | 45.306010 | 38.019765 | 49.700256 |
| H | 39.138045 | 39.836058 | 43.973446 | N          | 44.104472 | 38.664137 | 48.022563 |
| H | 40.024327 | 40.835813 | 42.781654 | C          | 43.030797 | 39.520144 | 47.913314 |
| H | 43.642656 | 41.314814 | 42.791362 | H          | 42.551904 | 39.689263 | 46.953041 |
| C | 49.779203 | 36.100490 | 45.484578 | C          | 43.933194 | 41.172763 | 54.502834 |
| C | 48.558957 | 35.507272 | 45.835597 | H          | 42.989461 | 41.643320 | 54.828514 |
| C | 47.417182 | 36.282350 | 46.013039 | H          | 44.714871 | 41.935297 | 54.634703 |
| C | 47.465763 | 37.672660 | 45.848178 | C          | 43.805603 | 40.897056 | 53.004850 |
| C | 48.698269 | 38.269088 | 45.549382 | O          | 43.762499 | 41.910672 | 52.265664 |
| C | 49.851526 | 37.499749 | 45.383086 | O          | 43.720870 | 39.708148 | 52.573267 |
| C | 46.222110 | 38.510799 | 46.004695 | C          | 42.450967 | 32.230340 | 48.694768 |
| O | 50.807325 | 35.273986 | 45.218407 | H          | 42.890075 | 33.238657 | 48.649731 |
| O | 45.050763 | 37.690760 | 45.993708 | H          | 42.644336 | 31.811101 | 49.695684 |
| H | 48.533155 | 34.422016 | 45.940066 | O          | 43.010262 | 31.388142 | 47.692055 |
| H | 46.469918 | 35.804025 | 46.266946 | H          | 43.610566 | 31.969123 | 47.162884 |

|   |           |           |           |   |           |           |           |
|---|-----------|-----------|-----------|---|-----------|-----------|-----------|
| C | 45.080513 | 43.167932 | 40.795029 | H | 47.956066 | 36.512560 | 41.318579 |
| H | 45.062254 | 42.427628 | 41.605497 | C | 43.516742 | 30.433318 | 44.473789 |
| H | 46.034290 | 43.714792 | 40.877561 | H | 42.964895 | 29.692338 | 43.877939 |
| O | 43.967685 | 44.016280 | 40.984349 | H | 43.004257 | 30.475938 | 45.450079 |
| H | 44.074080 | 44.836145 | 40.454712 | C | 43.286925 | 31.811400 | 43.830365 |
| C | 47.702470 | 47.189790 | 42.169687 | O | 44.221100 | 32.670635 | 43.782522 |
| H | 47.103520 | 47.739974 | 42.910014 | O | 42.111704 | 32.011940 | 43.457980 |
| H | 47.192025 | 47.268863 | 41.196340 | C | 44.626242 | 32.584188 | 39.607923 |
| C | 47.843907 | 45.734686 | 42.564906 | H | 43.544797 | 32.740922 | 39.494699 |
| C | 47.509884 | 45.279113 | 43.849898 | H | 44.818745 | 32.600949 | 40.689894 |
| H | 47.157373 | 45.994201 | 44.599243 | C | 45.348160 | 33.777964 | 38.983819 |
| C | 47.609536 | 43.926112 | 44.189859 | O | 45.869562 | 33.767989 | 37.863581 |
| H | 47.361114 | 43.581071 | 45.195561 | N | 45.349686 | 34.876744 | 39.772994 |
| C | 48.024658 | 42.985095 | 43.238694 | H | 45.748275 | 35.735684 | 39.395539 |
| O | 47.994239 | 41.662551 | 43.556741 | H | 44.852660 | 34.925390 | 40.674496 |
| H | 48.640288 | 41.173160 | 42.975205 | P | 39.907581 | 38.903178 | 40.631806 |
| C | 48.400485 | 43.433129 | 41.961849 | P | 42.519494 | 39.542394 | 41.949492 |
| H | 48.721251 | 42.713248 | 41.210111 | C | 41.403579 | 35.797327 | 46.405016 |
| C | 48.304929 | 44.785591 | 41.637169 | O | 42.462879 | 35.200320 | 47.149928 |
| H | 48.561204 | 45.102655 | 40.622657 | C | 41.970916 | 36.404311 | 45.121964 |
| C | 43.382704 | 35.444057 | 35.666804 | O | 43.091255 | 37.157658 | 45.589904 |
| H | 44.354812 | 34.973229 | 35.894820 | C | 42.414300 | 35.296078 | 44.173056 |
| H | 43.569322 | 36.206719 | 34.895587 | O | 41.275122 | 34.594078 | 43.744023 |
| C | 42.861889 | 36.065993 | 36.923224 | C | 43.267276 | 35.839763 | 43.029073 |
| N | 43.701383 | 36.755195 | 37.782624 | O | 43.692889 | 34.786962 | 42.176794 |
| H | 44.703106 | 36.933455 | 37.665017 | C | 44.480073 | 36.585596 | 43.619693 |
| C | 43.011552 | 37.184813 | 38.851762 | O | 45.268066 | 37.189132 | 42.622548 |
| H | 43.402762 | 37.770161 | 39.699185 | C | 44.079091 | 37.619126 | 44.699997 |
| N | 41.748850 | 36.805411 | 38.711788 | O | 39.174567 | 39.566329 | 39.508123 |
| H | 40.963908 | 37.044303 | 39.521761 | O | 43.683551 | 38.847913 | 41.229050 |
| C | 41.621372 | 36.121400 | 37.523826 | O | 40.204606 | 37.401362 | 40.566680 |
| H | 40.654671 | 35.759297 | 37.180861 | O | 42.889328 | 41.119618 | 42.107471 |
| C | 49.078091 | 35.019893 | 39.301974 | O | 41.310634 | 39.745943 | 40.837845 |
| H | 49.499546 | 35.310321 | 38.325319 | O | 41.968394 | 38.953881 | 43.217316 |
| H | 48.005035 | 35.255046 | 39.272931 | C | 39.191706 | 40.224432 | 42.863751 |
| C | 49.780681 | 35.827631 | 40.364610 | O | 39.172821 | 39.062936 | 42.092743 |
| C | 51.181473 | 35.924267 | 40.394614 | H | 44.684884 | 37.803882 | 42.101209 |
| H | 51.783556 | 35.346735 | 39.688484 | H | 41.580148 | 33.675857 | 43.543232 |
| C | 51.831256 | 36.788164 | 41.275570 | H | 43.155344 | 35.884039 | 47.141665 |
| H | 52.920952 | 36.867199 | 41.267069 | H | 40.898364 | 36.578014 | 47.003267 |
| C | 51.078428 | 37.596826 | 42.136513 | H | 40.674372 | 35.017196 | 46.151110 |
| O | 51.651567 | 38.543015 | 42.934545 | H | 41.253227 | 37.066464 | 44.610070 |
| H | 52.635085 | 38.379472 | 43.035221 | H | 43.064392 | 34.625403 | 44.759194 |
| C | 49.682110 | 37.480126 | 42.152189 | H | 42.658388 | 36.532377 | 42.428222 |
| H | 49.101958 | 38.087079 | 42.842483 | H | 43.924539 | 34.006150 | 42.746943 |
| C | 49.047124 | 36.597146 | 41.281935 | H | 45.109068 | 35.826279 | 44.114005 |

|   |           |           |           |   |    |             |             |             |
|---|-----------|-----------|-----------|---|----|-------------|-------------|-------------|
| H | 43.741162 | 38.547247 | 44.223211 | N | 0  | 42.11379500 | 39.56033600 | 52.73191500 |
| H | 39.255799 | 39.952459 | 43.927138 | C | 0  | 42.40694500 | 38.36676800 | 52.18245600 |
| H | 40.028609 | 40.894357 | 42.619242 | N | 0  | 42.05597800 | 38.30565400 | 50.89901800 |
| H | 43.652639 | 41.233605 | 42.727980 | H | -1 | 40.45102100 | 42.09765800 | 51.17319200 |
| C | 49.801599 | 36.139222 | 45.805995 | H | 0  | 41.95635700 | 42.41715800 | 52.06356800 |
| C | 48.516020 | 35.617353 | 46.005417 | H | 0  | 40.57132700 | 41.82804300 | 52.95205700 |
| C | 47.394394 | 36.420593 | 45.843404 | H | 0  | 42.38079500 | 39.84606200 | 53.76743600 |
| C | 47.518626 | 37.770372 | 45.486082 | H | 0  | 41.13016800 | 39.77336000 | 49.61943300 |
| C | 48.806737 | 38.305524 | 45.355462 | H | 0  | 42.88414800 | 37.56165300 | 52.73983500 |
| C | 49.942234 | 37.505076 | 45.509980 | C | -1 | 43.37900000 | 41.42400100 | 57.03499500 |
| C | 46.292323 | 38.587158 | 45.157200 | C | 0  | 42.63516000 | 41.16427800 | 55.69740200 |
| O | 50.824204 | 35.272323 | 45.906605 | O | 0  | 41.86335000 | 42.03710600 | 55.27522500 |
| O | 45.130536 | 37.902791 | 45.623051 | O | 0  | 42.93197200 | 40.05830900 | 55.14066800 |
| H | 48.426974 | 34.559138 | 46.252155 | H | -1 | 43.37096300 | 40.53611600 | 57.67579800 |
| H | 46.400035 | 35.996450 | 45.978486 | H | 0  | 42.93829200 | 42.28153700 | 57.56533000 |
| H | 48.929005 | 39.359344 | 45.083501 | H | 0  | 44.43750000 | 41.64863700 | 56.81480600 |
| H | 50.931829 | 37.926616 | 45.324675 | P | 0  | 37.17078400 | 38.45589900 | 44.16735600 |
| H | 46.213748 | 38.722347 | 44.068965 | P | 0  | 39.96322600 | 37.46839000 | 43.95707300 |
| H | 46.327909 | 39.590295 | 45.617180 | C | 0  | 38.58736900 | 37.71400500 | 49.49997800 |
| H | 51.712454 | 35.699188 | 45.730015 | O | 0  | 39.33567100 | 37.05299500 | 50.49285800 |
| H | 44.549688 | 38.219259 | 47.185139 | C | 0  | 38.77318200 | 37.13789900 | 48.10392400 |
| O | 45.028731 | 41.431907 | 43.827170 | O | 0  | 40.17795300 | 37.26040200 | 47.78813600 |
| H | 44.948213 | 42.215964 | 44.423276 | C | 0  | 38.34686600 | 35.67369200 | 48.01915600 |
| H | 45.988095 | 41.343290 | 43.669651 | O | 0  | 36.96082600 | 35.57011600 | 48.26916900 |
| O | 49.934655 | 40.642970 | 42.090827 | C | 0  | 38.68835400 | 35.07907900 | 46.65092400 |
| H | 50.003826 | 40.679286 | 41.109513 | O | 0  | 38.25181800 | 33.72794900 | 46.60235700 |
| H | 50.641938 | 40.051286 | 42.411611 | C | 0  | 40.19526000 | 35.24997200 | 46.46804600 |
| H | 41.003347 | 41.316027 | 49.091560 | O | 0  | 40.75444900 | 34.57829400 | 45.35956100 |
| H | 44.140212 | 40.359363 | 55.198240 | C | 0  | 40.56032400 | 36.74110400 | 46.56481100 |
| H | 41.377258 | 32.392342 | 48.600047 | O | 0  | 36.45178400 | 39.38205900 | 43.24650600 |
| H | 45.078389 | 42.624378 | 39.850248 | O | 0  | 40.00484800 | 36.09030700 | 43.36307400 |
| H | 48.673329 | 47.677402 | 42.081746 | O | 0  | 36.86342800 | 37.02850900 | 44.47273800 |
| H | 42.752003 | 34.681663 | 35.209599 | O | 0  | 41.33444700 | 38.26063900 | 43.55200600 |
| H | 49.154049 | 33.932999 | 39.332924 | O | 0  | 38.83701300 | 38.46790900 | 43.53539800 |
| H | 44.515925 | 30.046395 | 44.673764 | O | 0  | 39.92413200 | 37.54222600 | 45.55453000 |
| H | 44.871942 | 31.609198 | 39.187100 | C | -1 | 37.99899400 | 40.51898600 | 45.59997500 |
| H | 38.294829 | 40.833983 | 42.753635 | O | 0  | 37.50198200 | 39.20264700 | 45.60323500 |

**DFT Calculations (singly protonated at diphosphate of UDPG)**

The numbers 0 and -1 represent the unfrozen and frozen atoms during the geometry optimization, respectively.

**ES<sub>QC</sub>**

|   |    |             |             |             |   |   |             |             |             |
|---|----|-------------|-------------|-------------|---|---|-------------|-------------|-------------|
| C | -1 | 41.09000000 | 41.73702800 | 51.98602800 | H | 0 | 40.38716200 | 34.96868200 | 44.52298700 |
| C | 0  | 41.53311700 | 40.33132300 | 51.74728000 | H | 0 | 36.70479500 | 34.73797500 | 47.84204400 |
| C | 0  | 41.50892200 | 39.54058200 | 50.61321600 | H | 0 | 40.26273600 | 37.33480400 | 50.41188900 |
|   |    |             |             |             | H | 0 | 38.81772300 | 38.79656000 | 49.47330900 |
|   |    |             |             |             | H | 0 | 37.52140400 | 37.60184500 | 49.75261600 |
|   |    |             |             |             | H | 0 | 38.18248600 | 37.72363800 | 47.37920900 |
|   |    |             |             |             | H | 0 | 38.91895000 | 35.11557500 | 48.78850500 |
|   |    |             |             |             | H | 0 | 38.12317500 | 35.62416400 | 45.87490700 |

|                        |    |             |             |             |   |    |             |             |             |
|------------------------|----|-------------|-------------|-------------|---|----|-------------|-------------|-------------|
| H                      | 0  | 38.98080200 | 33.13862200 | 46.87278800 | C | 0  | 37.72454600 | 36.16155100 | 48.30372100 |
| H                      | 0  | 40.68077000 | 34.81167700 | 47.34529600 | O | 0  | 38.13597600 | 35.16834200 | 49.19459300 |
| H                      | 0  | 41.65103100 | 36.86789000 | 46.48538800 | C | 0  | 38.80353700 | 36.62085300 | 47.33058800 |
| H                      | 0  | 38.34808000 | 40.74405700 | 46.62096100 | O | 0  | 39.80115400 | 37.31120400 | 48.16899700 |
| H                      | 0  | 38.85373400 | 40.62995700 | 44.90991100 | C | 0  | 39.38706600 | 35.47526600 | 46.49483200 |
| H                      | 0  | 41.86679400 | 37.64289200 | 43.03214600 | O | 0  | 38.57888500 | 35.22953100 | 45.37133800 |
| C                      | 0  | 43.12042700 | 35.70821100 | 48.82773800 | C | 0  | 40.85061000 | 35.65437400 | 46.08446800 |
| C                      | 0  | 42.16464700 | 34.97727600 | 49.56702300 | O | 0  | 41.30192000 | 34.43035400 | 45.53146800 |
| C                      | 0  | 41.77487800 | 33.70824600 | 49.14305600 | C | 0  | 41.71091500 | 36.00923700 | 47.29701500 |
| C                      | 0  | 42.31332900 | 33.11405600 | 47.99004400 | O | 0  | 43.02793400 | 36.34365200 | 47.03345900 |
| C                      | 0  | 43.29727700 | 33.82810100 | 47.29053500 | C | 0  | 41.03868200 | 37.05252300 | 48.15377600 |
| C                      | 0  | 43.70299200 | 35.09304800 | 47.70030500 | O | 0  | 39.93967400 | 39.71995400 | 43.32208500 |
| C                      | 0  | 41.70787200 | 31.87190300 | 47.39011800 | O | 0  | 42.67566800 | 38.29160200 | 45.32986300 |
| O                      | 0  | 43.49710000 | 36.94775100 | 49.12892200 | O | 0  | 38.90542000 | 37.30654600 | 43.74566500 |
| O                      | 0  | 40.58333700 | 32.13488600 | 46.56243300 | O | 0  | 41.57123400 | 40.64343900 | 45.18607900 |
| H                      | 0  | 41.68950700 | 35.43658400 | 50.43446700 | O | 0  | 40.12983100 | 38.59472300 | 45.60732300 |
| H                      | 0  | 40.98844800 | 33.18539700 | 49.69612000 | O | 0  | 41.65513000 | 39.38667100 | 47.46055400 |
| H                      | 0  | 43.71908800 | 33.39965400 | 46.37615200 | C | -1 | 37.99911900 | 40.51951400 | 45.60134200 |
| H                      | 0  | 44.44572500 | 35.66238400 | 47.13685100 | O | 0  | 37.86610000 | 39.33491900 | 44.84248600 |
| H                      | 0  | 41.35454800 | 31.19161900 | 48.18374100 | H | -1 | 37.22855000 | 41.24368900 | 45.31670800 |
| H                      | 0  | 42.48454500 | 31.32486000 | 46.81599500 | H | 0  | 43.01164100 | 37.09066100 | 46.35669700 |
| H                      | 0  | 42.88949800 | 37.39008500 | 49.81229500 | H | 0  | 38.66109700 | 36.01230300 | 44.74886300 |
| H                      | 0  | 40.77711700 | 32.89510300 | 45.96222200 | H | 0  | 38.97663200 | 35.44560200 | 49.65155000 |
| <b>TS<sub>QC</sub></b> |    |             |             |             | H | 0  | 37.33291500 | 37.06139700 | 48.82448700 |
| C                      | -1 | 41.08956900 | 41.73744600 | 51.98664200 | H | 0  | 36.90870200 | 35.75773900 | 47.67979300 |
| C                      | 0  | 41.09568100 | 40.23830100 | 51.97235400 | H | 0  | 38.42188400 | 37.41225300 | 46.67570600 |
| C                      | 0  | 40.81891800 | 39.37303800 | 50.92749100 | H | 0  | 39.35409000 | 34.56775500 | 47.12091900 |
| N                      | 0  | 41.39578100 | 39.48887900 | 53.09269000 | H | 0  | 40.93269100 | 36.46325800 | 45.34704800 |
| C                      | 0  | 41.29673500 | 38.21438300 | 52.72997400 | H | 0  | 40.61224100 | 34.20519600 | 44.88816200 |
| N                      | 0  | 40.94910600 | 38.09875300 | 51.43387000 | H | 0  | 41.70934200 | 35.11577600 | 47.95859700 |
| H                      | -1 | 40.45147900 | 42.09747600 | 51.17275100 | H | 0  | 41.65551400 | 37.62049000 | 48.84476300 |
| H                      | 0  | 42.10155600 | 42.15227800 | 51.83524100 | H | 0  | 37.89779400 | 40.29866700 | 46.67920500 |
| H                      | 0  | 40.72851900 | 42.11411800 | 52.95472000 | H | 0  | 38.97994200 | 40.99850200 | 45.45364300 |
| H                      | 0  | 42.02508900 | 39.90658000 | 54.41414700 | H | 0  | 41.08260900 | 40.46846700 | 44.32635900 |
| H                      | 0  | 40.60523500 | 39.56087100 | 49.87509200 | C | 0  | 41.26666100 | 34.70578100 | 50.53457200 |
| H                      | 0  | 41.46997800 | 37.35543600 | 53.37646200 | C | 0  | 40.84646500 | 33.39362500 | 50.16834800 |
| C                      | -1 | 43.37865500 | 41.42372800 | 57.03450900 | C | 0  | 41.63296300 | 32.28215000 | 50.44509500 |
| C                      | 0  | 42.45966200 | 41.23462100 | 55.83229700 | C | 0  | 42.87859700 | 32.40069900 | 51.09040800 |
| O                      | 0  | 41.73658400 | 42.12590400 | 55.42347300 | C | 0  | 43.30599300 | 33.69029700 | 51.44220100 |
| O                      | 0  | 42.58188000 | 40.03959400 | 55.31001500 | C | 0  | 42.52883900 | 34.81547300 | 51.18113400 |
| H                      | -1 | 43.37123300 | 40.53612700 | 57.67581800 | C | 0  | 43.72296700 | 31.18299000 | 51.35633400 |
| H                      | 0  | 43.08340400 | 42.31750000 | 57.60010900 | O | 0  | 40.53311200 | 35.75222300 | 50.26216700 |
| H                      | 0  | 44.41214500 | 41.55381800 | 56.67236300 | O | 0  | 43.91289400 | 30.36865400 | 50.20370500 |
| P                      | 0  | 39.26054700 | 38.69660000 | 44.20916900 | H | 0  | 39.88245100 | 33.29255900 | 49.66435000 |
| P                      | 0  | 41.64960400 | 39.21963200 | 45.95525300 | H | 0  | 41.28762900 | 31.28852800 | 50.14170900 |
|                        |    |             |             |             | H | 0  | 44.28153900 | 33.81508400 | 51.92565100 |

|                        |    |             |             |             |                         |    |             |             |             |
|------------------------|----|-------------|-------------|-------------|-------------------------|----|-------------|-------------|-------------|
| H                      | 0  | 42.89240500 | 35.81199700 | 51.44375000 | O                       | 0  | 37.34212300 | 39.28278100 | 45.82547700 |
| H                      | 0  | 43.25204700 | 30.52074600 | 52.10783400 | H                       | -1 | 37.22845200 | 41.24373700 | 45.31709300 |
| H                      | 0  | 44.69543900 | 31.50402400 | 51.78586000 | H                       | 0  | 41.06981300 | 35.64779400 | 48.44393300 |
| H                      | 0  | 40.78496700 | 37.16654300 | 50.94118000 | H                       | 0  | 36.50758600 | 36.32276400 | 47.57729400 |
| H                      | 0  | 43.94940000 | 30.97812000 | 49.45287100 | H                       | 0  | 36.84760200 | 34.21142400 | 52.01176600 |
| <b>EP<sub>QC</sub></b> |    |             |             |             | H                       | 0  | 36.11933500 | 36.53362200 | 52.24605300 |
| C                      | -1 | 41.08976500 | 41.73705800 | 51.98610000 | H                       | 0  | 35.16459800 | 36.07817900 | 50.79550900 |
| C                      | 0  | 41.49776300 | 40.33263300 | 51.71992400 | H                       | 0  | 37.46907800 | 37.06659500 | 50.32708500 |
| C                      | 0  | 41.40005800 | 39.67105600 | 50.51837600 | H                       | 0  | 36.83920900 | 34.25275600 | 49.32944700 |
| N                      | 0  | 42.02165700 | 39.47585000 | 52.67500700 | H                       | 0  | 38.76771900 | 36.33019100 | 48.22163200 |
| C                      | 0  | 42.21558800 | 38.31405600 | 52.04638000 | H                       | 0  | 38.02288100 | 35.20345500 | 46.57403200 |
| N                      | 0  | 41.85758700 | 38.39929900 | 50.74560800 | H                       | 0  | 39.34530700 | 33.65922900 | 49.55220700 |
| H                      | -1 | 40.45121800 | 42.09778600 | 51.17309300 | H                       | 0  | 39.84280500 | 36.57082300 | 50.38125000 |
| H                      | 0  | 41.95744500 | 42.41855200 | 52.06393800 | H                       | 0  | 38.54493300 | 40.85322800 | 46.50039700 |
| H                      | 0  | 40.55198100 | 41.82466900 | 52.94290300 | H                       | 0  | 38.73034400 | 40.42909000 | 44.77895000 |
| H                      | 0  | 42.53349200 | 39.92688000 | 54.16665200 | H                       | 0  | 40.63291200 | 37.76521200 | 45.17645800 |
| H                      | 0  | 41.09296900 | 39.97668800 | 49.51446500 | C                       | 0  | 40.68226500 | 33.83397100 | 51.92992700 |
| H                      | 0  | 42.58031400 | 37.39637600 | 52.50369000 | C                       | 0  | 40.08027200 | 33.43102000 | 53.12940800 |
| C                      | -1 | 43.37884600 | 41.42362700 | 57.03455900 | C                       | 0  | 40.21352900 | 32.11359800 | 53.56809200 |
| C                      | 0  | 42.58610300 | 41.16954600 | 55.74122100 | C                       | 0  | 40.93787800 | 31.17636400 | 52.81446100 |
| O                      | 0  | 41.67570200 | 41.90030700 | 55.40132300 | C                       | 0  | 41.52217600 | 31.59298900 | 51.60936400 |
| O                      | 0  | 43.01735500 | 40.11622700 | 55.07998500 | C                       | 0  | 41.40555700 | 32.90990400 | 51.16409700 |
| H                      | -1 | 43.37110300 | 40.53630400 | 57.67606100 | C                       | 0  | 41.07578200 | 29.75223200 | 53.29974300 |
| H                      | 0  | 42.94508200 | 42.28096400 | 57.56449400 | O                       | 0  | 40.60415300 | 35.14087300 | 51.54559900 |
| H                      | 0  | 44.43146300 | 41.63155500 | 56.78290100 | O                       | 0  | 39.88612500 | 29.23375800 | 53.87221400 |
| P                      | 0  | 38.23220800 | 37.90329700 | 45.79281700 | H                       | 0  | 39.51284200 | 34.17200500 | 53.69480200 |
| P                      | 0  | 40.84318000 | 38.27729200 | 47.26390600 | H                       | 0  | 39.74053800 | 31.79470800 | 54.50066500 |
| C                      | 0  | 36.05276200 | 35.82491300 | 51.39384000 | H                       | 0  | 42.06960800 | 30.86734900 | 50.99915900 |
| O                      | 0  | 35.93199500 | 34.49216500 | 51.85247300 | H                       | 0  | 41.81488600 | 33.25427800 | 50.21180400 |
| C                      | 0  | 37.28370300 | 35.99111300 | 50.51374600 | H                       | 0  | 41.83982900 | 29.68352000 | 54.09573300 |
| O                      | 0  | 38.36039200 | 35.43215800 | 51.27099600 | H                       | 0  | 41.43575600 | 29.11756500 | 52.46370800 |
| C                      | 0  | 37.14437500 | 35.30377700 | 49.14805900 | H                       | 0  | 41.82101500 | 37.71796300 | 49.95197700 |
| O                      | 0  | 36.13826900 | 35.96810000 | 48.42204900 | H                       | 0  | 39.15862300 | 29.52355100 | 53.30400200 |
| C                      | 0  | 38.49417900 | 35.28318200 | 48.41988400 | <b>ES'<sub>QC</sub></b> |    |             |             |             |
| O                      | 0  | 38.40958700 | 34.56717500 | 47.21312400 | C                       | -1 | 42.05796400 | 41.09909000 | 49.97013600 |
| C                      | 0  | 39.60295000 | 34.70653700 | 49.30951700 | C                       | 0  | 42.37094500 | 39.68328300 | 49.61265600 |
| O                      | 0  | 40.86394300 | 34.70848900 | 48.70771400 | C                       | 0  | 42.16131200 | 38.94760600 | 48.45936200 |
| C                      | 0  | 39.60982700 | 35.52032200 | 50.61530000 | N                       | 0  | 42.99417300 | 38.83020700 | 50.49256200 |
| O                      | 0  | 39.12761900 | 37.90202600 | 44.56686600 | C                       | 0  | 43.13098300 | 37.64110800 | 49.87028700 |
| O                      | 0  | 41.27636200 | 37.30096600 | 48.37249300 | N                       | 0  | 42.64072200 | 37.66514700 | 48.63167200 |
| O                      | 0  | 37.25819100 | 36.77027300 | 46.05360200 | H                       | -1 | 41.21407800 | 41.45359900 | 49.36910100 |
| O                      | 0  | 41.37336500 | 37.70076900 | 45.85467900 | H                       | 0  | 42.92158200 | 41.76450200 | 49.81106000 |
| O                      | 0  | 39.18072600 | 38.08158600 | 47.12067100 | H                       | 0  | 41.82007900 | 41.19920500 | 51.03630600 |
| O                      | 0  | 41.11066000 | 39.74412100 | 47.46320900 | H                       | 0  | 43.27942000 | 39.10402300 | 51.51705700 |
| C                      | -1 | 37.99922000 | 40.51947000 | 45.60086500 | H                       | 0  | 41.70440500 | 39.25454700 | 47.51995500 |



|   |    |             |             |             |              |    |             |             |             |
|---|----|-------------|-------------|-------------|--------------|----|-------------|-------------|-------------|
| H | 0  | 43.58238600 | 36.77182900 | 50.34727500 | C            | 0  | 43.10835700 | 33.97268200 | 47.24888500 |
| C | -1 | 43.78801300 | 40.90300600 | 54.80198000 | C            | 0  | 44.35210100 | 34.39239100 | 46.75441900 |
| C | 0  | 43.67846700 | 40.68035200 | 53.27677600 | C            | 0  | 44.89515900 | 33.70642700 | 45.65925000 |
| O | 0  | 43.66757100 | 41.67801600 | 52.54190400 | C            | 0  | 44.19578800 | 32.67766700 | 45.02758000 |
| O | 0  | 43.57570600 | 39.45628400 | 52.94202700 | C            | 0  | 44.99914900 | 35.66347100 | 47.26325000 |
| H | -1 | 44.15962700 | 39.98292500 | 55.26501300 | O            | 0  | 42.16470200 | 31.43317100 | 44.76809600 |
| H | 0  | 42.78592900 | 41.12169500 | 55.21063600 | O            | 0  | 44.46562300 | 36.81457400 | 46.65564300 |
| H | 0  | 44.43987700 | 41.76075000 | 55.03049000 | H            | 0  | 41.41561800 | 32.64744900 | 46.98304300 |
| P | 0  | 38.08395900 | 37.81462200 | 42.29529000 | H            | 0  | 42.64461900 | 34.50355400 | 48.08278800 |
| P | 0  | 41.02902700 | 37.44474100 | 41.70233200 | H            | 0  | 45.85792500 | 34.03158800 | 45.25282500 |
| C | 0  | 39.61578000 | 36.71924000 | 47.04909000 | H            | 0  | 44.57662700 | 32.20100100 | 44.12235400 |
| O | 0  | 40.41277700 | 35.98819800 | 47.94470600 | H            | 0  | 46.08127800 | 35.63195300 | 47.03772000 |
| C | 0  | 40.00538400 | 36.52942300 | 45.58818300 | H            | 0  | 44.90132200 | 35.71728100 | 48.36561200 |
| O | 0  | 41.38651300 | 36.91857600 | 45.47740300 | H            | 0  | 41.47063400 | 31.99505600 | 44.34064700 |
| C | 0  | 39.77994600 | 35.07971400 | 45.13879900 | H            | 0  | 43.68099500 | 37.08168700 | 47.18820000 |
| O | 0  | 38.40520400 | 34.80400500 | 44.94132000 |              |    |             |             |             |
| C | 0  | 40.54421800 | 34.68621500 | 43.87425300 |              |    |             |             |             |
| O | 0  | 40.44059600 | 33.25826700 | 43.72403900 | <b>TS'qc</b> |    |             |             |             |
| C | 0  | 41.98584300 | 35.16397100 | 43.92594500 | C            | -1 | 42.05795800 | 41.09910000 | 49.97013500 |
| O | 0  | 42.75968200 | 34.84456700 | 42.80339700 | C            | 0  | 42.66648600 | 39.82673900 | 49.48453100 |
| C | 0  | 41.97429600 | 36.66864900 | 44.26059300 | C            | 0  | 42.60494200 | 39.19653600 | 48.25610600 |
| O | 0  | 37.08196400 | 38.45831300 | 41.40311200 | N            | 0  | 43.47944900 | 39.08490400 | 50.31755000 |
| O | 0  | 41.31050000 | 36.15985300 | 40.98558800 | C            | 0  | 43.89005000 | 38.04205500 | 49.59927700 |
| O | 0  | 38.06633300 | 36.38154000 | 42.75508100 | N            | 0  | 43.38848100 | 38.06997800 | 48.35076100 |
| O | 0  | 42.00976600 | 38.62061800 | 41.14140400 | H            | -1 | 41.21407500 | 41.45359700 | 49.36910400 |
| O | 0  | 39.60447300 | 38.09080100 | 41.50388200 | H            | 0  | 42.80947300 | 41.90349700 | 50.03099500 |
| O | 0  | 41.24677800 | 37.47677800 | 43.27823800 | H            | 0  | 41.68767700 | 40.96358300 | 50.99948200 |
| C | -1 | 38.72298300 | 40.07292300 | 43.52695700 | H            | 0  | 43.62584500 | 39.42953600 | 51.82501100 |
| O | 0  | 38.36525400 | 38.71620100 | 43.64444200 | H            | 0  | 42.07491300 | 39.44271500 | 47.33900400 |
| H | -1 | 37.99102800 | 40.64841300 | 42.95068300 | H            | 0  | 44.54278700 | 37.24836200 | 49.96053300 |
| H | 0  | 42.26152400 | 35.13861900 | 42.01036900 | C            | -1 | 43.78802700 | 40.90300600 | 54.80196300 |
| H | 0  | 38.12492100 | 35.38533300 | 44.18953100 | C            | 0  | 43.88176700 | 40.78059200 | 53.28081600 |
| H | 0  | 41.26245700 | 36.46848800 | 48.05078800 | O            | 0  | 44.14724200 | 41.72987100 | 52.56878600 |
| H | 0  | 39.63097900 | 37.80113800 | 47.28393000 | O            | 0  | 43.61852400 | 39.55775100 | 52.87503200 |
| H | 0  | 38.57415700 | 36.36972900 | 47.14478500 | H            | -1 | 44.15961200 | 39.98291700 | 55.26501000 |
| H | 0  | 39.39641100 | 37.19676700 | 44.96107200 | H            | 0  | 42.72918300 | 41.01762100 | 55.08757800 |
| H | 0  | 40.13477200 | 34.42781700 | 45.95233500 | H            | 0  | 44.34735700 | 41.78227600 | 55.14754000 |
| H | 0  | 40.03904100 | 35.14161900 | 43.01000200 | P            | 0  | 39.30235000 | 38.81451900 | 41.26954700 |
| H | 0  | 39.49867600 | 33.09183600 | 43.89830600 | P            | 0  | 42.05690200 | 40.03484000 | 41.93563900 |
| H | 0  | 42.48475400 | 34.71939200 | 44.79347300 | C            | 0  | 40.29617800 | 36.10638600 | 46.29310200 |
| H | 0  | 43.00553800 | 37.04363100 | 44.31352000 | O            | 0  | 41.29255100 | 35.20062800 | 46.67360900 |
| H | 0  | 38.78362300 | 40.48853500 | 44.54514900 | C            | 0  | 40.62481600 | 36.89621000 | 45.03514800 |
| H | 0  | 39.71063400 | 40.18561900 | 43.04689400 | O            | 0  | 41.76477500 | 37.76318600 | 45.40009300 |
| H | 0  | 42.60608600 | 38.20570600 | 40.50294600 | C            | 0  | 40.86836300 | 36.01774900 | 43.79267300 |
| C | 0  | 42.92240300 | 32.31587400 | 45.48296200 | O            | 0  | 39.62930200 | 35.71466400 | 43.21075700 |
| C | 0  | 42.40704200 | 32.93826900 | 46.63008100 | C            | 0  | 41.82546500 | 36.73487500 | 42.83937100 |
|   |    |             |             |             | O            | 0  | 41.96505100 | 36.05112400 | 41.61445500 |

|   |    |             |             |             |                          |    |             |             |             |
|---|----|-------------|-------------|-------------|--------------------------|----|-------------|-------------|-------------|
| C | 0  | 43.16372600 | 36.92831000 | 43.55048700 | <b>EP'</b> <sub>QC</sub> |    |             |             |             |
| O | 0  | 44.18664800 | 37.51588600 | 42.82767900 | C                        | -1 | 42.05771400 | 41.09901300 | 49.97016300 |
| C | 0  | 42.90136600 | 37.68438800 | 44.83039700 | C                        | 0  | 42.39157400 | 39.69973200 | 49.59277700 |
| O | 0  | 38.18652500 | 39.45077200 | 40.50780700 | C                        | 0  | 42.31977600 | 39.11666600 | 48.34704300 |
| O | 0  | 43.11939600 | 39.23513600 | 41.19825300 | N                        | 0  | 42.78972200 | 38.75241300 | 50.51684600 |
| O | 0  | 39.72432000 | 37.36519100 | 41.02275000 | C                        | 0  | 42.93147300 | 37.61400900 | 49.83364700 |
| O | 0  | 42.29812700 | 41.62707800 | 41.56618100 | N                        | 0  | 42.66416600 | 37.80157300 | 48.52441800 |
| O | 0  | 40.61044300 | 39.82250400 | 41.16660100 | H                        | -1 | 41.21416500 | 41.45381300 | 49.36911200 |
| O | 0  | 41.90613900 | 39.90079900 | 43.42996100 | H                        | 0  | 42.90587200 | 41.79364600 | 49.85162100 |
| C | -1 | 38.72299200 | 40.07295500 | 43.52701000 | H                        | 0  | 41.76009400 | 41.14949900 | 51.02772000 |
| O | 0  | 39.00267700 | 38.83728800 | 42.90379700 | H                        | 0  | 43.03483900 | 39.23027500 | 52.00467400 |
| H | -1 | 37.99103100 | 40.64838200 | 42.95065000 | H                        | 0  | 42.08505000 | 39.49176400 | 47.34821000 |
| H | 0  | 43.80178700 | 38.18138200 | 42.17442600 | H                        | 0  | 43.18043800 | 36.64340900 | 50.25575600 |
| H | 0  | 39.49172000 | 36.33482900 | 42.45109500 | C                        | -1 | 43.78809300 | 40.90288600 | 54.80171600 |
| H | 0  | 42.18372500 | 35.64714100 | 46.62969600 | C                        | 0  | 43.71373500 | 40.64049800 | 53.28990900 |
| H | 0  | 40.05770900 | 36.82885500 | 47.10357400 | O                        | 0  | 44.17646500 | 41.41560600 | 52.47587000 |
| H | 0  | 39.37392400 | 35.54355500 | 46.06755400 | O                        | 0  | 43.11073700 | 39.50068000 | 53.02660000 |
| H | 0  | 39.82969600 | 37.60654600 | 44.77546000 | H                        | -1 | 44.15958400 | 39.98293900 | 55.26507600 |
| H | 0  | 41.33168900 | 35.07320600 | 44.11817200 | H                        | 0  | 42.77860800 | 41.09292200 | 55.19968700 |
| H | 0  | 41.40143600 | 37.72048800 | 42.64858200 | H                        | 0  | 44.44592500 | 41.75570600 | 55.01038600 |
| H | 0  | 41.23425900 | 36.44672000 | 41.07453000 | P                        | 0  | 38.82109300 | 37.50794100 | 44.12790600 |
| H | 0  | 43.48934700 | 35.93877200 | 43.87380700 | P                        | 0  | 41.69209100 | 37.77811800 | 45.08480700 |
| H | 0  | 43.62268200 | 38.44466300 | 45.13196900 | C                        | 0  | 39.30671700 | 36.06640800 | 49.99488700 |
| H | 0  | 38.29586400 | 39.85610800 | 44.52187600 | O                        | 0  | 38.99640000 | 34.85455700 | 50.65471100 |
| H | 0  | 39.64937200 | 40.65311100 | 43.66484400 | C                        | 0  | 39.85412000 | 35.86347500 | 48.58861400 |
| H | 0  | 42.71650900 | 41.63472500 | 40.69470200 | O                        | 0  | 41.14310400 | 35.20529500 | 48.70206600 |
| C | 0  | 44.05434100 | 33.86688700 | 42.57073100 | C                        | 0  | 38.86111000 | 35.12382500 | 47.67044400 |
| C | 0  | 43.33921700 | 33.36985400 | 43.67344800 | O                        | 0  | 37.75504200 | 35.95846500 | 47.42505100 |
| C | 0  | 43.69168700 | 33.75030200 | 44.96663000 | C                        | 0  | 39.60537300 | 34.70168500 | 46.40563100 |
| C | 0  | 44.76644100 | 34.62977400 | 45.18303700 | O                        | 0  | 38.73675200 | 34.13115200 | 45.42506200 |
| C | 0  | 45.58950100 | 34.94903600 | 44.09536900 | C                        | 0  | 40.80358700 | 33.79223100 | 46.72980700 |
| C | 0  | 45.24693000 | 34.56446700 | 42.79611400 | O                        | 0  | 41.91348800 | 34.06501200 | 45.91423100 |
| C | 0  | 44.77179400 | 35.48110600 | 46.43888300 | C                        | 0  | 41.26259500 | 33.92048100 | 48.21762800 |
| O | 0  | 43.53245300 | 33.76795300 | 41.31261400 | O                        | 0  | 39.45703100 | 37.23368700 | 42.77717500 |
| O | 0  | 43.69577400 | 36.38122900 | 46.41274100 | O                        | 0  | 42.18601900 | 36.73104600 | 46.09733600 |
| H | 0  | 42.43071900 | 32.79441300 | 43.48188300 | O                        | 0  | 37.81906200 | 36.53773600 | 44.73221800 |
| H | 0  | 43.02577600 | 33.50072300 | 45.79610200 | O                        | 0  | 41.91564800 | 37.20171200 | 43.59551000 |
| H | 0  | 46.41943300 | 35.64652000 | 44.23977200 | O                        | 0  | 40.00770700 | 37.75548300 | 45.22241200 |
| H | 0  | 45.79701000 | 34.94578400 | 41.93457100 | O                        | 0  | 42.13394900 | 39.20356700 | 45.25039000 |
| H | 0  | 45.74919700 | 36.00703900 | 46.51680900 | C                        | -1 | 38.72313500 | 40.07314400 | 43.52734500 |
| H | 0  | 44.69295900 | 34.83021500 | 47.34028000 | O                        | 0  | 38.05413000 | 38.96008300 | 44.09235800 |
| H | 0  | 42.90060300 | 34.53144100 | 41.25526200 | H                        | -1 | 37.99100700 | 40.64816400 | 42.95046100 |
| H | 0  | 43.55941900 | 37.33697100 | 47.55258200 | H                        | 0  | 42.05939400 | 35.04934300 | 45.90957500 |
|   |    |             |             |             | H                        | 0  | 37.78912700 | 36.29716700 | 46.50087900 |
|   |    |             |             |             | H                        | 0  | 39.65746400 | 34.19997400 | 50.36292100 |
|   |    |             |             |             | H                        | 0  | 40.04408000 | 36.66350100 | 50.56922400 |

|   |   |             |             |             |
|---|---|-------------|-------------|-------------|
| H | 0 | 38.38077100 | 36.65712100 | 49.90712300 |
| H | 0 | 40.05262100 | 36.84254500 | 48.12659100 |
| H | 0 | 38.49486700 | 34.23161900 | 48.19893200 |
| H | 0 | 40.03597000 | 35.61970500 | 45.99055000 |
| H | 0 | 38.30465700 | 34.91970300 | 45.00694200 |
| H | 0 | 40.51402900 | 32.75767000 | 46.53413400 |
| H | 0 | 42.33853800 | 33.66988800 | 48.21442900 |
| H | 0 | 39.17226900 | 40.70332900 | 44.31415000 |
| H | 0 | 39.52687100 | 39.74926800 | 42.84520500 |
| H | 0 | 41.03884900 | 37.15880700 | 43.10338000 |
| C | 0 | 38.35184400 | 31.19042600 | 45.75538300 |
| C | 0 | 37.77885400 | 31.66081000 | 46.94732700 |
| C | 0 | 38.50779800 | 31.61360600 | 48.12602800 |
| C | 0 | 39.81417100 | 31.09922200 | 48.13308000 |
| C | 0 | 40.27607400 | 30.42854600 | 46.99642200 |
| C | 0 | 39.53916700 | 30.45233800 | 45.80727300 |
| C | 0 | 40.75316400 | 31.66557700 | 49.17296400 |
| O | 0 | 37.83331600 | 31.58541600 | 44.55984800 |
| O | 0 | 40.62476100 | 33.07751000 | 49.21806100 |
| H | 0 | 36.83515100 | 32.20605500 | 46.89300800 |
| H | 0 | 38.13651900 | 32.13369100 | 49.01254100 |
| H | 0 | 41.29358100 | 30.02498000 | 46.98417900 |
| H | 0 | 39.95992700 | 30.07092100 | 44.87439800 |
| H | 0 | 41.79850300 | 31.36781000 | 48.95879000 |
| H | 0 | 40.50896700 | 31.32597200 | 50.19465700 |
| H | 0 | 37.98151500 | 32.56111000 | 44.59264700 |
| H | 0 | 42.58874300 | 37.13767900 | 47.71531700 |

#### 4. Supplementary References

- (1) Planas, F.; McLeish, M.J.; Himo, F. Enzymatic Stetter Reaction: Computational Study of the Reaction Mechanism of MenD. *ACS Catalysis* **2021**, *11* (19), 12355-12366.
- (2) Guo, F.; Zhang, X.; You, C.; Zhang, C.; Li, F.; Li, N.; Xia, Y.; Liu, M.; Qiu, Z.; Zheng, X.; Ma, L.; Zhang, G.; Luo, L.; Cao, F.; Feng, Y.; Zhao, G.-R.; Zhang, W.; Li, S.; Du, L. Diversification of phenolic glucosides by two UDP-glucosyltransferases featuring complementary regioselectivity. *Microbial Cell Factories*. **2022**, *21* (1), 208.
- (3) Haynes, W.M. CRC Handbook of Chemistry and Physics (97th ed.). **2016**, CRC Press. pp. 5–88. ISBN 9781498754293.
